# Supplementary material for: HF-addition to haloacetyl fluorides in superacidic media
Source: Royal Society of Chemistry journal article supplement (doi:10.1039/d4nj02884h), 2024-01-01
Supplement: d4nj02884h1.pdf [file d4nj02884h1.pdf]

## Supporting Information

### HF-Addition to Haloacetyl Fluorides in Superacidic Media

Sebastian Steiner,\* Zurwa M. Shafiq, Alexander Nitzer, Dirk Hollenwäger and Andreas J. Kornath

**Abstract:** The reactions of difluoroacetyl fluoride and trifluoroacetyl fluoride were investigated in the binary superacid HF/SbF<sub>5</sub> by low-temperature NMR spectroscopy. Whereas both haloacetyl fluorides form oxonium species after the addition of HF, the protonated acyl fluorides were not observed. Protonated 1,1,2,2-tetrafluoroethanol was isolated as a solid and represents an example of a protonated  $\alpha$ -fluoroalcohol. The salt was characterized by low-temperature vibrational spectroscopy and single-crystal X-ray diffraction. [CHF<sub>2</sub>CF<sub>2</sub>OH<sub>2</sub>][SbF<sub>6</sub>] crystallizes in the triclinic space group  $P\bar{1}$  with two formula units per unit cell. Protonated perfluoroethanol is only stable in solution. The reactivity of both haloacetyl fluorides is discussed based on quantum chemical calculations at the MP2/aug-cc-pVTZ-level of theory.

## Figures:

- Figure S1.** Low-temperature Raman and IR spectra of  $[\text{CHF}_2\text{CF}_2\text{OX}_2][\text{SbF}_6]$  (**1**, **2**) ( $X = \text{H}, \text{D}$ ) and vibrational spectra of  $\text{CHF}_2\text{COF}$ .
- Figure S2.** Chains along the  $a$ -axis of **1** (displacement ellipsoids with 50% probability).
- Figure S3.** Chains along the  $c$ -axis of **1** (displacement ellipsoids with 50% probability).
- Figure S4.** Intermolecular  $\text{F}\cdots\text{F}$  contacts of **1** (displacement ellipsoids with 50% probability).
- Figure S5.**  $^1\text{H}$  and  $^{19}\text{F}$  NMR spectra of  $\text{CHF}_2\text{COF}$  in  $a\text{HF}$  at  $-60^\circ\text{C}$ .
- Figure S6.**  $^{13}\text{C}$  NMR spectrum of  $\text{CHF}_2\text{COF}$  in  $a\text{HF}$  at  $-60^\circ\text{C}$ .
- Figure S7.**  $^1\text{H}$  and  $^{19}\text{F}$  NMR spectra of  $\text{CHF}_2\text{COF}$  in  $\text{HF}/\text{SbF}_5$  at  $-60^\circ\text{C}$ .
- Figure S8.**  $^{13}\text{C}$  NMR spectra of  $\text{CHF}_2\text{COF}$  in  $\text{HF}/\text{SbF}_5$  at  $-60^\circ\text{C}$ .
- Figure S9.**  $^1\text{H}$ - $^{19}\text{F}$ -COSY NMR spectrum of  $\text{CHF}_2\text{COF}$  in  $\text{HF}/\text{SbF}_5$  at  $-60^\circ\text{C}$ .
- Figure S10.**  $^1\text{H}$  and  $^{19}\text{F}$  NMR spectra of  $\text{CF}_3\text{COF}$  in  $a\text{HF}$  at  $-70^\circ\text{C}$ .
- Figure S11.**  $^{13}\text{C}$  NMR spectrum of  $\text{CF}_3\text{COF}$  in  $a\text{HF}$  at  $-70^\circ\text{C}$ .
- Figure S12.**  $^1\text{H}$  and  $^{19}\text{F}$  NMR spectra of  $\text{CF}_3\text{COF}$  in  $\text{HF}/\text{SbF}_5$  at  $-70^\circ\text{C}$ .
- Figure S13.**  $^{13}\text{C}$  NMR spectra of  $\text{CF}_3\text{COF}$  in  $\text{HF}/\text{SbF}_5$  at  $-70^\circ\text{C}$ .
- Figure S14.**  $^{13}\text{C}$  NMR spectra of  $\text{CF}_3\text{COF}$  in  $\text{HF}/\text{SbF}_5$  at  $-70^\circ\text{C}$ .
- Figure S15.** Calculated gas phase structure of  $[\text{CHF}_2\text{CF}_2\text{OH}_2]^+\cdot 2\text{HF}$ . Bond lengths are given in  $\text{\AA}$ . Calculated at the  $\omega\text{B97XD}/\text{aug-cc-pVTZ}$ -level of theory.
- Figure S16.** Calculated gas phase structure of  $[\text{CCl}_2\text{C}(\text{OH})\text{F}]^+\cdot\text{HF}$ ,  $[\text{CH}_2\text{FC}(\text{OH})\text{F}]^+\cdot\text{HF}$  and  $[\text{CCl}_2\text{HC}(\text{OH})\text{F}]^+\cdot\text{HF}$ . Bond lengths are given in  $\text{\AA}$ . Calculated at the  $\text{MP2}/\text{aug-cc-pVTZ}$ -level of theory.
- Figure S17.** Calculated gas phase structure of  $[\text{CHF}_2\text{C}(\text{OH})\text{F}]^+\cdot\text{HF}$  and  $[\text{CF}_3\text{C}(\text{OH})\text{F}]^+\cdot\text{HF}$ . Bond lengths are given in  $\text{\AA}$ . Calculated at the  $\text{MP2}/\text{aug-cc-pVTZ}$ -level of theory.
- Figure S18.** Fingerprint plots of the cation in the crystal structure of **1**.

## Tables:

- Table S1.** Low-temperature Raman and IR spectra of  $[\text{CHF}_2\text{CF}_2\text{OH}_2][\text{SbF}_6]$  (**1**) and  $[\text{CHF}_2\text{CF}_2\text{OD}_2][\text{SbF}_6]$  (**2**) and calculated frequencies  $[\text{cm}^{-1}]$  of  $[\text{CHF}_2\text{CF}_2\text{OH}_2]^+\cdot 2\text{HF}$ .
- Table S2.** Low-temperature Raman and IR spectra of  $\text{CHF}_2\text{COF}$  and calculated vibrational frequencies  $[\text{cm}^{-1}]$  of  $\text{CHF}_2\text{COF}$ .
- Table S3.** Low-temperature Raman and IR spectra of  $\text{CF}_3\text{COF}$  and calculated vibrational frequencies  $[\text{cm}^{-1}]$  of  $\text{CF}_3\text{COF}$ .
- Table S4.** X-ray data and refinement of  $[\text{CHF}_2\text{CF}_2\text{OH}_2][\text{SbF}_6]$  (**1**).
- Table S5.** Bond lengths  $[\text{\AA}]$  and bond angles  $[\circ]$  of  $[\text{CHF}_2\text{CF}_2\text{OH}_2][\text{SbF}_6]$  (**1**) as well as donor-acceptor distances of **1**.
- Table S6.** Standard orientations of  $\text{CHF}_2\text{COF}$ .
- Table S7.** Standard orientations of  $\text{CF}_3\text{COF}$ .
- Table S8.** Standard orientations of  $[\text{CHF}_2\text{CF}_2\text{OH}_2]^+\cdot 2\text{HF}$  and  $[\text{CF}_3\text{CF}_2\text{OH}_2]^+\cdot 2\text{HF}$ .
- Table S9.** Standard orientations of  $\text{CCl}_2\text{HCOF}$ . Calculated at the  $\text{MP2}/\text{aug-cc-pVTZ}$ -level of theory.
- Table S10.** Standard orientations of  $[\text{CCl}_2\text{HC}(\text{OH})\text{F}]^+\cdot\text{HF}$ . Calculated at the  $\text{MP2}/\text{aug-cc-pVTZ}$ -level of theory.
- Table S11.** Standard orientations of  $[\text{CHF}_2\text{C}(\text{OH})\text{F}]^+\cdot\text{HF}$ .
- Table S12.** Standard orientations of  $[\text{CF}_3\text{C}(\text{OH})\text{F}]^+\cdot\text{HF}$ .
- Table S13.** Calculated NPA charges of  $\text{CCl}_2\text{HCOF}$ ,  $\text{CHF}_2\text{COF}$ ,  $\text{CF}_3\text{COF}$ ,  $[\text{CCl}_2\text{HC}(\text{OH})\text{F}]^+\cdot\text{HF}$ ,  $[\text{CHF}_2\text{C}(\text{OH})\text{F}]^+\cdot\text{HF}$ , and  $[\text{CF}_3\text{C}(\text{OH})\text{F}]^+\cdot\text{HF}$ . Calculated at the  $\text{MP2}/\text{aug-cc-pVTZ}$ -level of theory.
- Table S14.** Selected energies of donor-acceptor interactions from second-order perturbation theory analysis of  $\text{CCl}_2\text{HCOF}$ ,  $\text{CHF}_2\text{COF}$ ,  $\text{CF}_3\text{COF}$ ,  $[\text{CCl}_2\text{HC}(\text{OH})\text{F}]^+\cdot\text{HF}$ ,  $[\text{CHF}_2\text{C}(\text{OH})\text{F}]^+\cdot\text{HF}$ , and  $[\text{CF}_3\text{C}(\text{OH})\text{F}]^+\cdot\text{HF}$ . Calculated at the  $\text{MP2}/\text{aug-cc-pVTZ}$ -level of theory.
- Table S15.** Calculated MEP values at the  $\pi$ -holes of  $\text{CCl}_2\text{HCOF}$ ,  $\text{CHF}_2\text{COF}$ ,  $\text{CF}_3\text{COF}$ ,  $[\text{CCl}_2\text{HC}(\text{OH})\text{F}]^+\cdot\text{HF}$ ,  $[\text{CHF}_2\text{C}(\text{OH})\text{F}]^+\cdot\text{HF}$ , and  $[\text{CF}_3\text{C}(\text{OH})\text{F}]^+\cdot\text{HF}$ . Calculated at the  $\text{MP2}/\text{aug-cc-pVTZ}$ -level of theory.

## Experimental Section

**Caution!** Avoid skin contact with all compounds. Hydrolysis can lead to the formation of HF or DF that burns skin and causes irreparable damage. Ensure appropriate safety precautions while handling these materials.

**Apparatus and Materials:** All reactions were performed employing standard Schlenk techniques using a stainless-steel vacuum line. Syntheses were carried out using FEP/PFA tube reactors closed with stainless-steel valves. Before use, the stainless-steel vacuum line and all reactors were dried with fluorine. Low-temperature Raman spectra were recorded under vacuum using glass cells cooled with liquid nitrogen and a Bruker® MultiRAMII FT Raman spectrometer equipped with Nd:YAG laser ( $\lambda = 1064$  nm) and a laser excitation of 500-1000 mW. Low-temperature IR spectra were recorded with a Bruker® Vertex FT IR spectrometer at  $-196$  °C. For measurements, low-temperature IR cells<sup>1</sup> were prepared with CsBr single-crystal plates coated with a small amount of the samples. For visualization, the software Advanced Chemistry Development Inc.® (ACD/Labs 2015) was employed. Low-temperature X-ray diffraction was performed with an Oxford XCalibur3 diffractometer equipped with a Spellman Generator (50 kV, 40 mA) and a Kappa CCD detector, using Mo-K $\alpha$  radiation ( $\lambda = 0.71073$  Å). The program CrysAlisPro 1.171.40.82a (Rigaku OD, 2020)<sup>2</sup> was employed for the data collection and reduction. The structure solution and refinement were performed with the software SHELXT<sup>3</sup> and SHELXL-2018/3,<sup>4</sup> implemented in the WinGX software package.<sup>5</sup> The solution was checked with the program PLATON<sup>6</sup> and the absorption correction was performed using the SCALE3 ABSPACK multi-scan-method.<sup>7</sup> Selected data and parameters of the single-crystal X-ray structure analyses are summarized in Table S4 for **1** (see Supporting Information). Crystallographic data (excluding structure factors) for the structures in this paper were deposited at the Cambridge Crystallographic Data Centre, CCDC, 12 Union Road, Cambridge CB21EZ, UK. Copies of the data can be obtained free of charge by quoting the depository number CCDC-2312629 for [CHF<sub>2</sub>CF<sub>2</sub>OH<sub>2</sub>][SbF<sub>6</sub>] (**1**) (Fax: +44-1223-336-033; E-Mail: [deposit@ccdc.cam.ac.uk](mailto:deposit@ccdc.cam.ac.uk), <http://www.ccdc.cam.ac.uk>). NMR samples were prepared by adding the HF solution to a small FEP tube under a nitrogen stream. The tube was sealed under vacuum and inserted into a standard NMR tube. For <sup>1</sup>H, <sup>19</sup>F, and <sup>13</sup>C measurements a JEOL ECX 400 and Bruker BioSpin GmbH AV400RT NMR spectrometer were used with acetone-*d*<sub>6</sub> as an external standard. For evaluation, MNOVA by Mestrelab was used.<sup>8</sup> Quantum chemical calculations were performed at the  $\omega$ B97XD/aug-cc-pVTZ- and MP2/aug-cc-pVTZ-level of theory by Gaussian16.<sup>9</sup> GaussView 6.0 was used for visualization and illustration of the MEP calculations.<sup>10</sup> Hirshfeld surface analysis was performed with the CrystalExplorer software.<sup>11,12</sup>

**Synthesis of [CHF<sub>2</sub>CF<sub>2</sub>OH<sub>2</sub>][SbF<sub>6</sub>] (**1**):** Antimony pentafluoride (1 mmol, 217 mg, 1.0 eq) and anhydrous hydrogen fluoride (100 mmol, 2 mL) were condensed into an FEP tube-reactor at  $-196$  °C. To form the superacid, the mixture was warmed up to  $-50$  °C and both components were mixed. After the mixture was cooled to  $-196$  °C again, difluoroacetyl fluoride (1 mmol, 98.0 mg, 1.0 eq.) was condensed into the reaction vessel. Subsequently, the mixture was warmed up to  $-60$  °C, and all components were reacted. Then, the temperature was reduced to  $-196$  °C. The remaining HF was removed in dynamic vacuum at  $-78$  °C. Compound (**1**) was obtained in quantitative yield as a colorless solid. Compound (**2**) was prepared analogously, using *o*DF instead of *o*HF.

**Synthesis of [CF<sub>3</sub>CF<sub>2</sub>OH<sub>2</sub>][SbF<sub>6</sub>] (**3**):** Antimony pentafluoride (1 mmol, 217 mg, 1.0 eq) and anhydrous hydrogen fluoride (100 mmol, 2 mL) were condensed into an FEP tube-reactor at  $-196$  °C. To form the superacid, the mixture was warmed up to  $-50$  °C and both components were mixed. After the mixture was cooled to  $-196$  °C again, trifluoroacetyl fluoride (1 mmol, 116 mg, 1.0 eq.) was condensed into the reaction vessel. Subsequently, the mixture was warmed up to  $-70$  °C, and all components were reacted. For NMR measurements, the samples were prepared as mentioned before.

**Table S1.** Low-temperature Raman and IR spectra of [CHF<sub>2</sub>CF<sub>2</sub>OH<sub>2</sub>][SbF<sub>6</sub>] (1) and [CHF<sub>2</sub>CF<sub>2</sub>OD<sub>2</sub>][SbF<sub>6</sub>] (2) and calculated frequencies [cm<sup>-1</sup>] of [CHF<sub>2</sub>CF<sub>2</sub>OH<sub>2</sub>]<sup>+</sup>·2HF.

| [CHF <sub>2</sub> CF <sub>2</sub> OH <sub>2</sub> ][SbF <sub>6</sub> ] (1) |        | [CHF <sub>2</sub> CF <sub>2</sub> OD <sub>2</sub> ][SbF <sub>6</sub> ] (2) |          | [CHF <sub>2</sub> CF <sub>2</sub> OH <sub>2</sub> ] <sup>+</sup> ·2HF | Assignment |            |                                            |                                         |
|----------------------------------------------------------------------------|--------|----------------------------------------------------------------------------|----------|-----------------------------------------------------------------------|------------|------------|--------------------------------------------|-----------------------------------------|
| Raman                                                                      | IR     | Raman                                                                      | IR       | calc. <sup>[a,b]</sup> (IR/Raman) <sup>[c]</sup>                      |            |            |                                            |                                         |
| 3055(25)                                                                   |        | 3055(50)                                                                   | 3053 m   | 2983(5/81)                                                            | $\nu_1$    | A          | $\nu(\text{C-H})$                          |                                         |
|                                                                            |        |                                                                            | 2922 w   | 2957(1531/86)                                                         | $\nu_2$    | A          | $\nu(\text{OH}_2)$                         |                                         |
|                                                                            |        |                                                                            |          | 2892(1873/42)                                                         | $\nu_3$    | A          | $\nu(\text{OH}_2)$                         |                                         |
| 2706(3)                                                                    | 1751 s | 2700(6)                                                                    | 2821(4)  |                                                                       |            |            |                                            |                                         |
|                                                                            |        |                                                                            | 2554 w   |                                                                       |            |            |                                            |                                         |
|                                                                            |        |                                                                            | 2498 w   |                                                                       |            |            |                                            |                                         |
|                                                                            |        |                                                                            | 2403(3)  | 2403 m                                                                |            |            |                                            | $\nu(\text{OD}_2)$                      |
|                                                                            |        |                                                                            | 2286(5)  | 2330 m                                                                |            |            |                                            | $\nu(\text{OD}_2)$                      |
|                                                                            |        |                                                                            |          | 1709 w                                                                |            |            |                                            |                                         |
|                                                                            |        |                                                                            |          | 1626(106/0)                                                           |            | $\nu_4$    | A                                          | $\delta(\text{OH}_2)$                   |
|                                                                            |        |                                                                            |          | 1479 w                                                                |            |            |                                            |                                         |
|                                                                            |        |                                                                            |          | 1460 w                                                                |            |            |                                            |                                         |
|                                                                            |        |                                                                            | 1362(13) | 1364 s                                                                | 1359(19)   | 1358 w     | 1406(14/1)                                 | $\nu_5$                                 |
| 1328(4)                                                                    | 1329 s | 1285(6)                                                                    | 1331 w   | 1325(15/2)                                                            | $\nu_6$    | A          | $\delta(\text{C-H})$                       |                                         |
|                                                                            |        |                                                                            | 1286 m   | 1298(95/1)                                                            | $\nu_7$    | A          | $\delta(\text{C-H})$                       |                                         |
| 1251(11)                                                                   | 1256 s | 1251(12)                                                                   | 1256 m   | 1235(236/2)                                                           | $\nu_8$    | A          | $\nu(\text{C-F})$<br>$+\delta(\text{C-H})$ |                                         |
|                                                                            |        | 1205(3)                                                                    | 1196 m   |                                                                       |            |            |                                            |                                         |
| 1164(5)                                                                    | 1151 s | 1144(6)                                                                    |          | 1152(181/2)                                                           | $\nu_9$    | A          | $\nu(\text{C}_\text{H-F})$                 |                                         |
| 1124(13)                                                                   |        | 1125(15)                                                                   | 1121 m   | 1102(6/4)                                                             | $\nu_{10}$ | A          | $\nu(\text{C}_\text{H-F})$                 |                                         |
| 1112(12)                                                                   | 1113 s | 1105(7)                                                                    |          | 1090(258/1)                                                           | $\nu_{11}$ | A          | $\tau(\text{OH}_2)$                        |                                         |
|                                                                            |        |                                                                            | 1024 w   |                                                                       |            |            |                                            |                                         |
|                                                                            |        |                                                                            | 997 w    |                                                                       |            |            |                                            |                                         |
|                                                                            |        |                                                                            | 922 s    |                                                                       |            |            |                                            |                                         |
|                                                                            |        |                                                                            | 891(4)   | 889 m                                                                 |            |            |                                            |                                         |
| 836(34)                                                                    | 835 s  | 816(30)                                                                    | 814 m    | 1045(89/3)                                                            | $\nu_{12}$ | A          | $\nu(\text{C-O})$                          |                                         |
|                                                                            |        |                                                                            |          | 922(169/0)                                                            | $\nu_{13}$ | A          | $\kappa(\text{OH}_2)$                      |                                         |
|                                                                            |        |                                                                            | 758(3)   | 756 w                                                                 | 755(67/5)  | $\nu_{14}$ | A                                          | $\nu(\text{C-C})$<br>$+\nu(\text{C-O})$ |
|                                                                            |        |                                                                            |          | 729(4/1)                                                              | $\nu_{15}$ | A          | $\tau(\text{OH}_2)$                        |                                         |
| 696(8)                                                                     | 699 vs |                                                                            |          | 682(12/3)                                                             | $\nu_{16}$ | A          | $\delta(\text{CF}_2)$                      |                                         |
| 571(32)                                                                    | 569 s  | 565(19)                                                                    | 563 m    | 554(8/1)                                                              | $\nu_{17}$ | A          | $\delta(\text{CF}_2)$                      |                                         |
| 548(16)                                                                    |        | 552(20)                                                                    |          | 544(4/1)                                                              | $\nu_{18}$ | A          | $\delta(\text{COF}_2)$                     |                                         |
| 529(8)                                                                     | 527 s  | 522(20)                                                                    | 517 w    | 505(33/0)                                                             | $\nu_{19}$ | A          | $\delta(\text{COF}_2)$                     |                                         |
|                                                                            |        |                                                                            | 449 w    |                                                                       |            |            |                                            |                                         |

|          |       |          |       |           |            |   |                        |
|----------|-------|----------|-------|-----------|------------|---|------------------------|
| 420(13)  | 417 s |          |       |           |            |   |                        |
| 367(32)  | 364 s | 367(37)  | 359 s | 350(6/1)  | $\nu_{20}$ | A | $\delta(\text{CCF}_2)$ |
| 257(7)   |       | 255(7)   |       | 308(40/0) | $\nu_{21}$ | A | $\delta(\text{CCO})$   |
| 206(7)   |       | 205(7)   |       | 205(5/0)  | $\nu_{22}$ | A | $\tau(\text{CF}_2)$    |
|          |       |          |       | 170(1/0)  | $\nu_{23}$ | A | $\delta(\text{CCO})$   |
| 112(5)   |       | 112(6)   |       | 85(6/0)   | $\nu_{24}$ | A | $\tau(\text{CF}_2)$    |
| 707(28)  |       | 702(16)  |       |           |            |   | $\nu(\text{Sb-F})$     |
| 682(100) |       | 683(100) |       |           |            |   | $\nu(\text{Sb-F})$     |
| 666(72)  |       | 666(75)  | 667 s |           |            |   | $\nu(\text{Sb-F})$     |
| 643(68)  |       | 642(64)  | 646 s |           |            |   | $\nu(\text{Sb-F})$     |
| 480(6)   | 488 s | 484(8)   | 484 m |           |            |   | $\delta(\text{Sb-F})$  |
|          | 426 s |          |       |           |            |   | $\delta(\text{Sb-F})$  |
|          | 405 s | 406(15)  | 409 m |           |            |   | $\delta(\text{Sb-F})$  |
|          | 388 s |          | 386 w |           |            |   | $\delta(\text{Sb-F})$  |
|          | 378 s |          | 372 s |           |            |   | $\delta(\text{Sb-F})$  |
| 337(7)   |       | 330(10)  |       |           |            |   | $\delta(\text{Sb-F})$  |
| 322(7)   |       | 320(8)   |       |           |            |   | $\delta(\text{Sb-F})$  |
| 282(44)  |       | 282(50)  |       |           |            |   | $\delta(\text{Sb-F})$  |
| 268(31)  |       | 269(32)  |       |           |            |   | $\delta(\text{Sb-F})$  |
| 193(5)   |       | 193(6)   |       |           |            |   | $\delta(\text{Sb-F})$  |
| 175(3)   |       | 175(4)   |       |           |            |   | $\delta(\text{Sb-F})$  |
| 152(5)   |       | 151(6)   |       |           |            |   | $\delta(\text{Sb-F})$  |

[a] Calculated at  $\omega\text{B97XD/aug-cc-pVTZ}$ -level of theory, [b] Frequencies are scaled with a factor of 0.956, [c] IR intensity in  $[\text{km/mol}]$  und Raman intensity in  $[\text{\AA}^4/\text{u}]$ . Abbreviations for IR intensities: vs = very strong, s = strong, m = medium, w = weak.

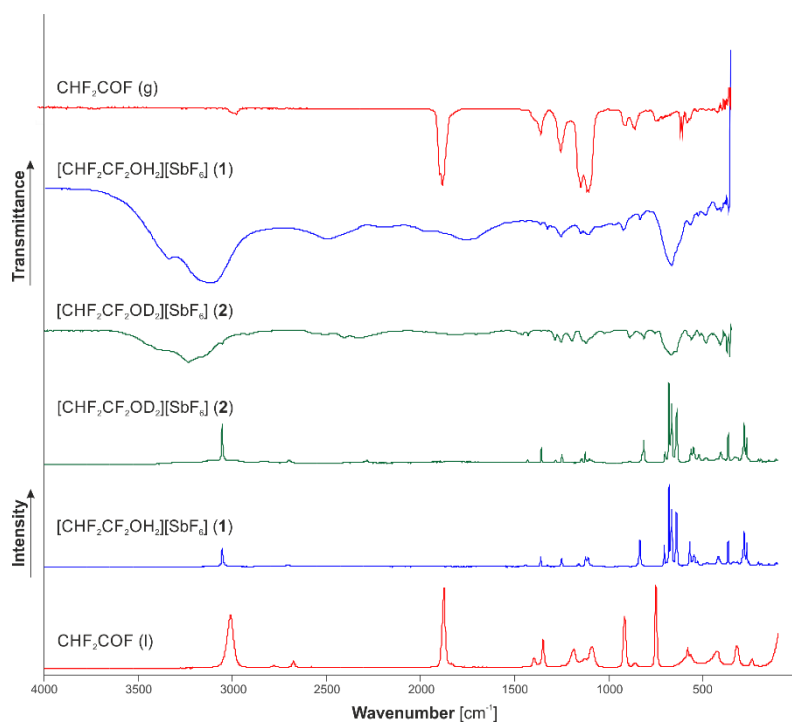

Figure S1. Low-temperature Raman and IR spectra of  $[\text{CHF}_2\text{CF}_2\text{OX}_2][\text{SbF}_6]$  (1, 2) ( $X = \text{H}, \text{D}$ ) and vibrational spectra of  $\text{CHF}_2\text{COF}$ .

**Table S2.** Low-temperature Raman and IR spectra of CHF<sub>2</sub>COF and calculated vibrational frequencies [cm<sup>-1</sup>] of CHF<sub>2</sub>COF.<sup>13</sup>

| CHF <sub>2</sub> COF<br>Raman | CHF <sub>2</sub> COF<br>IR | CHF <sub>2</sub> COF<br>calc. <sup>[a,b]</sup> (IR/Raman) <sup>[c]</sup> | Assignment |     |                            |
|-------------------------------|----------------------------|--------------------------------------------------------------------------|------------|-----|----------------------------|
| 3010(65)                      | 2980 m                     | 2991(13/66)                                                              | $\nu_1$    | A'  | $\nu_s(\text{C-H})$        |
| 2779(4)                       |                            |                                                                          |            |     | $\nu(\text{C-H})$          |
| 2676(8)                       |                            |                                                                          |            |     |                            |
| 1876(98)                      | 1886 vs                    | 1864(245/15)                                                             | $\nu_2$    | A'  | $\nu_s(\text{C=O})$        |
| 1840(6)                       |                            |                                                                          |            |     |                            |
| 1398(13)                      |                            | 1329(52/1)                                                               | $\nu_3$    | A'  | $\delta_s(\text{C-H})$     |
| 1350(34)                      | 1362 m                     | 1323(11/2)                                                               | $\nu_{11}$ | A'' | $\delta_{as}(\text{C-H})$  |
| 1250(4)                       | 1256 s                     | 1230(201/2)                                                              | $\nu_4$    | A'  | $\nu_s(\text{C-F})$        |
| 1188(23)                      |                            |                                                                          |            |     |                            |
|                               | 1151 vs                    |                                                                          |            |     |                            |
| 1128(11)                      | 1117 vs                    | 1097(63/4)                                                               | $\nu_5$    | A'  | $\nu_s(\text{CF}_2)$       |
| 1090(27)                      | 1107 vs                    | 1082(217/3)                                                              | $\nu_{12}$ | A'' | $\nu_{as}(\text{CF}_2)$    |
| 919(64)                       | 916 m                      |                                                                          |            |     |                            |
| 862(7)                        | 864 m                      | 834(81/7)                                                                | $\nu_6$    | A'  | $\nu_s(\text{C-C})$        |
| 751(100)                      | 748 m                      | 739(20/0)                                                                | $\nu_{13}$ | A'' | $\kappa_{as}(\text{COF})$  |
| 699(3)                        | 704 m                      | 685(50/2)                                                                | $\nu_7$    | A'  | $\delta_s(\text{COF})$     |
|                               | 619 m                      |                                                                          |            |     |                            |
|                               | 611 m                      |                                                                          |            |     |                            |
| 581(27)                       | 581 m                      | 563(15/2)                                                                | $\nu_8$    | A'  | $\delta_s(\text{CF}_2)$    |
| 569(18)                       | 571 m                      |                                                                          |            | A'' | $\delta(\text{CF}_2)$      |
| 501(7)                        |                            |                                                                          |            |     |                            |
| 421(21)                       | 426 m                      | 397(2/2)                                                                 | $\nu_9$    | A'  | $\delta_s(\text{CCO})$     |
| 322(28)                       |                            |                                                                          |            |     |                            |
| 240(12)                       |                            | 241(6/0)                                                                 | $\nu_{10}$ | A'  | $\delta_s(\text{CCF})$     |
| 211(4)                        |                            | 228(6/0)                                                                 | $\nu_{14}$ | A'' | $\gamma_{as}(\text{CF}_2)$ |
|                               |                            | 44(4/1)                                                                  | $\nu_{15}$ | A'' | <i>lattice</i>             |

[a] Calculated at  $\omega\text{B97XD/aug-cc-pVTZ}$ -level of theory, [b] Frequencies are scaled with a factor of 0.956, [c] IR intensity in [km/mol] und Raman intensity in [ $\text{\AA}^4/\text{u}$ ]. Abbreviations for IR intensities: vs = very strong, s = strong, m = medium, w = weak.

**Table S3.** Low-temperature Raman and IR spectra of CF<sub>3</sub>COF and calculated vibrational frequencies [cm<sup>-1</sup>] of CF<sub>3</sub>COF.<sup>14</sup>

| CF <sub>3</sub> COF<br>Raman | CF <sub>3</sub> COF<br>IR | CF <sub>3</sub> COF<br>calc. <sup>[a,b]</sup> (IR/Raman) <sup>[c]</sup> | Assignment |     |                            |
|------------------------------|---------------------------|-------------------------------------------------------------------------|------------|-----|----------------------------|
| 1888(27)                     | 1896 w                    | 1889(244/15)                                                            | $\nu_1$    | A'  | $\nu_s(\text{C=O})$        |
| 1342(7)                      | 1331 w                    | 1285(86/2)                                                              | $\nu_2$    | A'  | $\nu_s(\text{C-F})$        |
| 1244(3)                      | 1252 s<br>1211 m          | 1210(333/1)                                                             | $\nu_3$    | A'  | $\nu_s(\text{C-F})$        |
| 1193(4)                      | 1200 s                    | 1158(288/2)                                                             | $\nu_{11}$ | A'' | $\nu_{as}(\text{C-F})$     |
| 1092(3)                      | 1097 vs                   | 1072(276/1)                                                             | $\nu_4$    | A'  | $\nu_s(\text{C-F})$        |
| 809(100)                     | 803 w                     | 783(6/10)                                                               | $\nu_5$    | A'  | $\nu_s(\text{C-C})$        |
| 768(4)                       |                           |                                                                         |            |     |                            |
| 759(4)                       | 760 w<br>700 w            | 746(19/0)                                                               | $\nu_{12}$ | A'' | $\kappa_{as}(\text{COF})$  |
| 692(5)                       | 692 w                     | 672(47/0)                                                               | $\nu_6$    | A'  | $\delta_s(\text{COF})$     |
| 595(9)                       |                           | 571(1/1)                                                                | $\nu_7$    | A'  | $\delta_s(\text{CF}_2)$    |
| 519(6)                       |                           | 500(7/1)                                                                | $\nu_{13}$ | A'' | $\delta_{as}(\text{CF}_2)$ |
| 427(22)                      |                           | 408(2/1)                                                                | $\nu_8$    | A'  | $\delta_s(\text{CCF})$     |
| 387(40)                      |                           | 368(0/2)                                                                | $\nu_9$    | A'  | $\delta_s(\text{CCF})$     |
| 245(11)                      |                           | 232(5/0)                                                                | $\nu_{14}$ | A'' | $\tau_{as}(\text{CF}_2)$   |
|                              |                           | 219(3/0)                                                                | $\nu_{10}$ | A'  | $\delta_s(\text{CCF})$     |
|                              |                           | 43(1/0)                                                                 | $\nu_{15}$ | A'' | $\tau_{as}(\text{COF})$    |

[a] Calculated at  $\omega$ B97XD/aug-cc-pVTZ-level of theory, [b] Frequencies are scaled with a factor of 0.956, [c] IR intensity in [km/mol] und Raman intensity in [ $\text{\AA}^4/\text{u}$ ]. Abbreviations for IR intensities: vs = very strong, s = strong, m = medium, w = weak.

**Table S4.** X-ray data and refinement of [CHF<sub>2</sub>CF<sub>2</sub>OH<sub>2</sub>][SbF<sub>6</sub>] (**1**).

|                                                                         | [CHF <sub>2</sub> CF <sub>2</sub> OH <sub>2</sub> ][SbF <sub>6</sub> ] ( <b>1</b> ) |
|-------------------------------------------------------------------------|-------------------------------------------------------------------------------------|
| formula                                                                 | C <sub>2</sub> H <sub>3</sub> F <sub>10</sub> OSb                                   |
| M <sub>r</sub> [g mol <sup>-1</sup> ]                                   | 354.79                                                                              |
| crystal size [mm <sup>3</sup> ]                                         | 0.373 x 0.154 x 0.118                                                               |
| crystal system                                                          | triclinic                                                                           |
| space group                                                             | $P\bar{1}$                                                                          |
| <i>a</i> [Å]                                                            | 6.3267(5)                                                                           |
| <i>b</i> [Å]                                                            | 7.8117(5)                                                                           |
| <i>c</i> [Å]                                                            | 8.5217(5)                                                                           |
| $\alpha$ [°]                                                            | 85.971(5)                                                                           |
| $\beta$ [°]                                                             | 87.605(6)                                                                           |
| $\gamma$ [°]                                                            | 85.482(6)                                                                           |
| <i>V</i> [Å <sup>3</sup> ]                                              | 418.54(5)                                                                           |
| <i>Z</i>                                                                | 2                                                                                   |
| $\rho_{\text{calc}}$ [g cm <sup>-3</sup> ]                              | 2.815                                                                               |
| $\mu$ [mm <sup>-1</sup> ]                                               | 3.473                                                                               |
| $\lambda_{\text{MoK}\alpha}$ [Å]                                        | 0.71073                                                                             |
| F(000)                                                                  | 328                                                                                 |
| <i>T</i> [K]                                                            | 101(2)                                                                              |
| hkl range                                                               | -9:-9, -11:11, -12:12                                                               |
| refl. measured                                                          | 8217                                                                                |
| refl. unique                                                            | 2548                                                                                |
| <i>R</i> <sub>int</sub>                                                 | 0.0504                                                                              |
| parameters                                                              | 139                                                                                 |
| R( <i>F</i> )/wR( <i>F</i> <sup>2</sup> ) <sup>a</sup> (all reflexions) | 0.0349/0.0597                                                                       |
| weighting scheme <sup>b</sup>                                           | 0.0173/0.0000                                                                       |
| <i>S</i> (GoF) <sup>c</sup>                                             | 1.081                                                                               |
| residual density [e Å <sup>-3</sup> ]                                   | 1.199/-1.246                                                                        |
| device type                                                             | Oxford XCalibur                                                                     |
| solution                                                                | SHELXT <sup>15</sup>                                                                |
| refinement                                                              | SHELXL-2018/3 <sup>16</sup>                                                         |
| CCDC                                                                    | 2312629                                                                             |

<sup>a</sup>  $R_1 = \sum ||F_0| - |F_c|| / \sum |F_0|$ ;<sup>b</sup>  $wR_2 = [\sum [w(F_0^2 - F_c^2)^2] / \sum (F_0^2)]^{1/2}$ ;  $w = [\sigma_c^2(F_0^2) + (xP)^2 + yP]^{-1}$ ;  $P = (F_0^2 + 2F_c^2)/3$ ;<sup>c</sup>  $\text{GoF} = [\sum [(F_0^2 - F_c^2)^2] / (n-p)]^{1/2}$  (*n* = number of reflexions; *p* = total numbers of parameters).



**Table S5.** Bond lengths [Å] and bond angles [°] of [CHF<sub>2</sub>CF<sub>2</sub>OH<sub>2</sub>][SbF<sub>6</sub>] (**1**) as well as donor-acceptor distances of **1**. Symmetry codes: *i* = -1+x, *y*, *z*; *ii* = 1-x, 1-y, 1-z; *iii* = *x*, 1+y, *z*; *iv* = 1-x, -y, 2-z; *v* = 1-x, 1-y, 2-z.

| [CHF <sub>2</sub> CF <sub>2</sub> OH <sub>2</sub> ][SbF <sub>6</sub> ] ( <b>1</b> ) |           |                 |           |
|-------------------------------------------------------------------------------------|-----------|-----------------|-----------|
| Bond lengths [Å]                                                                    |           |                 |           |
| C1–C2                                                                               | 1.524(5)  | Sb1–F5          | 1.925(2)  |
| C1–F1                                                                               | 1.318(4)  | Sb1–F6          | 1.914(2)  |
| C1–F2                                                                               | 1.325(4)  | Sb1–F7          | 1.854(2)  |
| C2–F3                                                                               | 1.341(4)  | Sb1–F8          | 1.853(2)  |
| C2–F4                                                                               | 1.346(4)  | Sb1–F9          | 1.857(2)  |
| C1–O1                                                                               | 1.424(4)  | Sb1–F10         | 1.862(2)  |
| Bond angles [°]                                                                     |           |                 |           |
| C2–C1–O1                                                                            | 109.1(3)  | F5–Sb1–F9       | 88.45(8)  |
| F1–C1–F2                                                                            | 110.0(3)  | F5–Sb1–F10      | 87.20(8)  |
| F1–C1–C2                                                                            | 111.9(3)  | F6–Sb1–F7       | 88.35(9)  |
| F2–C1–C2                                                                            | 110.6(3)  | F6–Sb1–F8       | 90.97(9)  |
| F3–C2–F4                                                                            | 108.5(3)  | F6–Sb1–F9       | 87.29(9)  |
| F3–C2–C1                                                                            | 108.1(3)  | F6–Sb1–F10      | 174.37(8) |
| F4–C2–C1                                                                            | 107.2(3)  | F7–Sb1–F8       | 92.69(9)  |
| F1–C1–O1                                                                            | 106.3(3)  | F7–Sb1–F9       | 173.57(9) |
| F2–C1–O1                                                                            | 108.8(2)  | F7–Sb1–F10      | 92.02(9)  |
| F5–Sb1–F6                                                                           | 87.21(8)  | F8–Sb1–F9       | 92.10(9)  |
| F5–Sb1–F7                                                                           | 86.62(8)  | F8–Sb1–F10      | 94.62(9)  |
| F5–Sb1–F8                                                                           | 178.08(8) | F9–Sb1–F10      | 91.86(9)  |
| Dihedral angles [°]                                                                 |           |                 |           |
| F3–C2–C1–F1                                                                         | 55.0(3)   | F4–C2–C1–F2     | -65.2(3)  |
| F4–C2–C1–F1                                                                         | 171.8(2)  | F3–C2–C1–O1     | -62.4(3)  |
| F3–C2–C1–F2                                                                         | 178.0(2)  | F4–C2–C1–O1     | 54.5(3)   |
| Donor-acceptor distances [Å]                                                        |           |                 |           |
| O1(–H1)⋯F6 <i>i</i>                                                                 | 2.471(3)  | O1⋯F9 <i>iv</i> | 2.689(3)  |
| O1(–H2)⋯F5                                                                          | 2.452(3)  | F5⋯F3 <i>v</i>  | 2.888(3)  |
| C2(–H3)⋯F7 <i>ii</i>                                                                | 3.129(4)  | F5⋯F9 <i>iv</i> | 2.890(2)  |
| C2(–H3)⋯F10 <i>iii</i>                                                              | 3.166(4)  |                 |           |

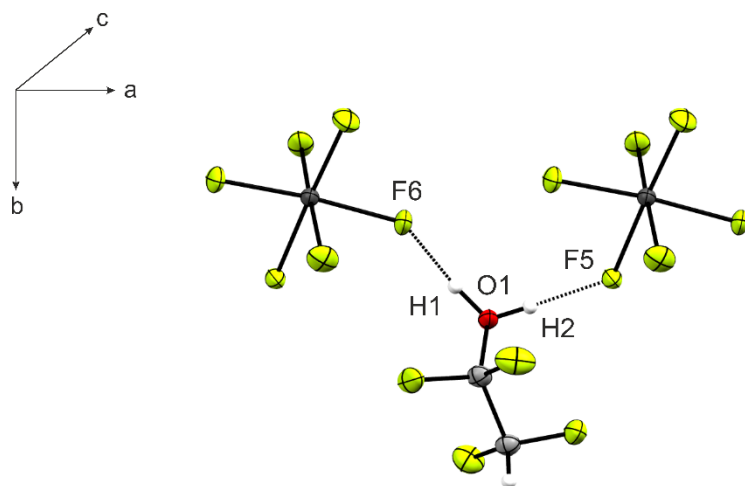

**Figure S2.** Chains along the *a*-axis of **1** (displacement ellipsoids with 50% probability).

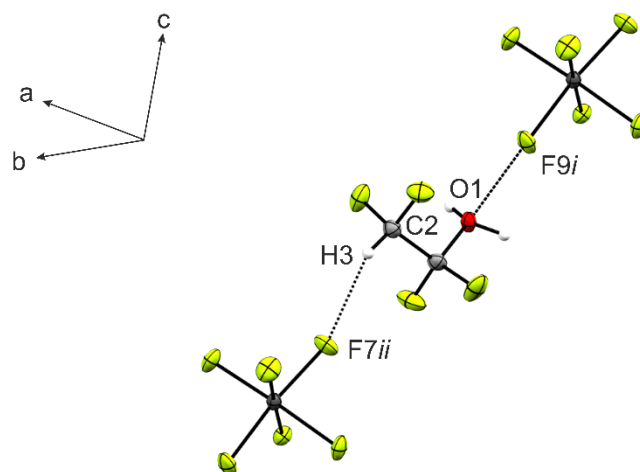

**Figure S3.** Chains along the *c*-axis of **1** (displacement ellipsoids with 50% probability).  
Symmetry codes: *i* = 1-*x*, -*y*, 2-*z*; *ii* = 1-*x*, 1-*y*, 1-*z*.

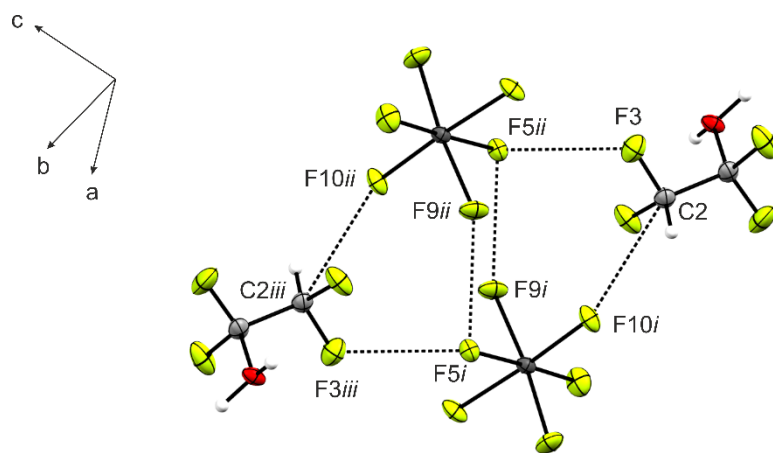

**Figure S4.** Intermolecular F...F contacts of **1** (displacement ellipsoids with 50% probability).  
Symmetry codes: *i* = *x*, 1+*y*, *z*; *ii* = 1-*x*, 1-*y*, 2-*z*; *iii* = 1+*x*, 2-*y*, 2-*z*.

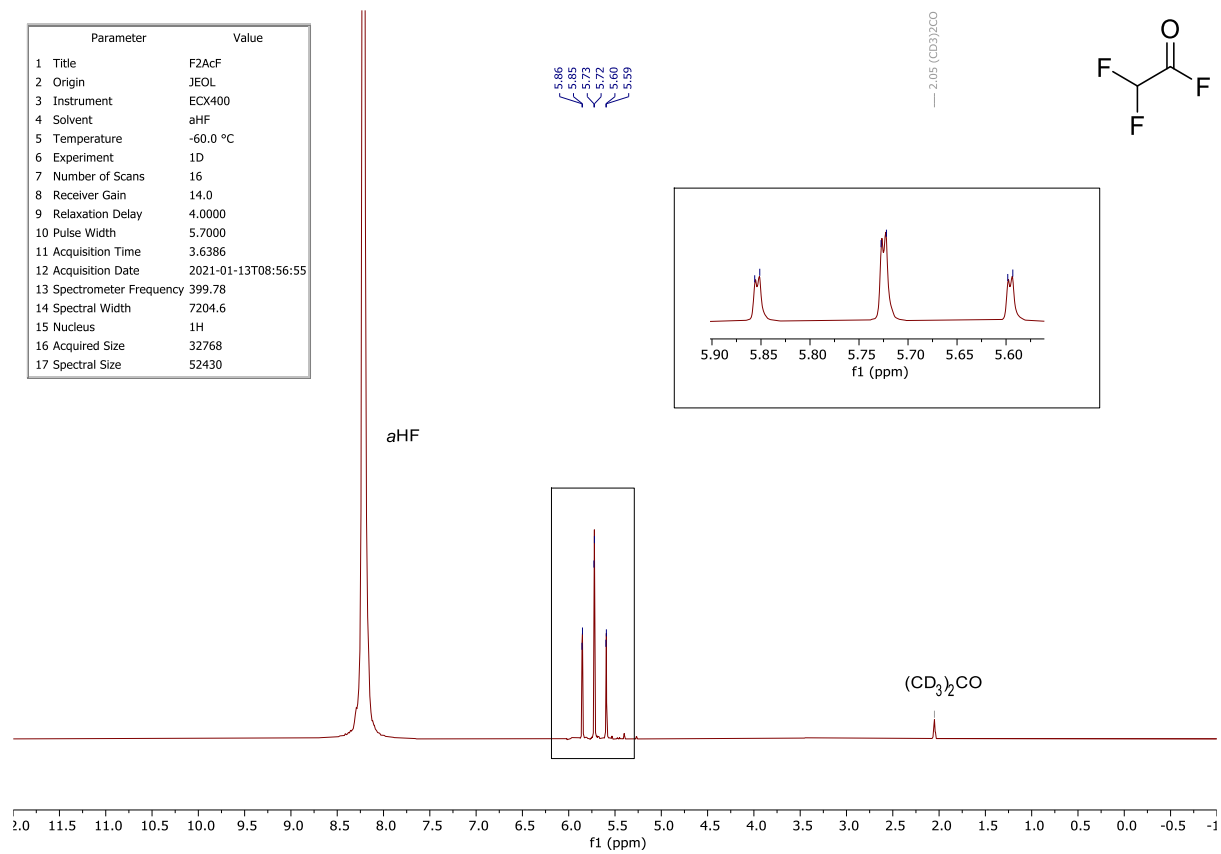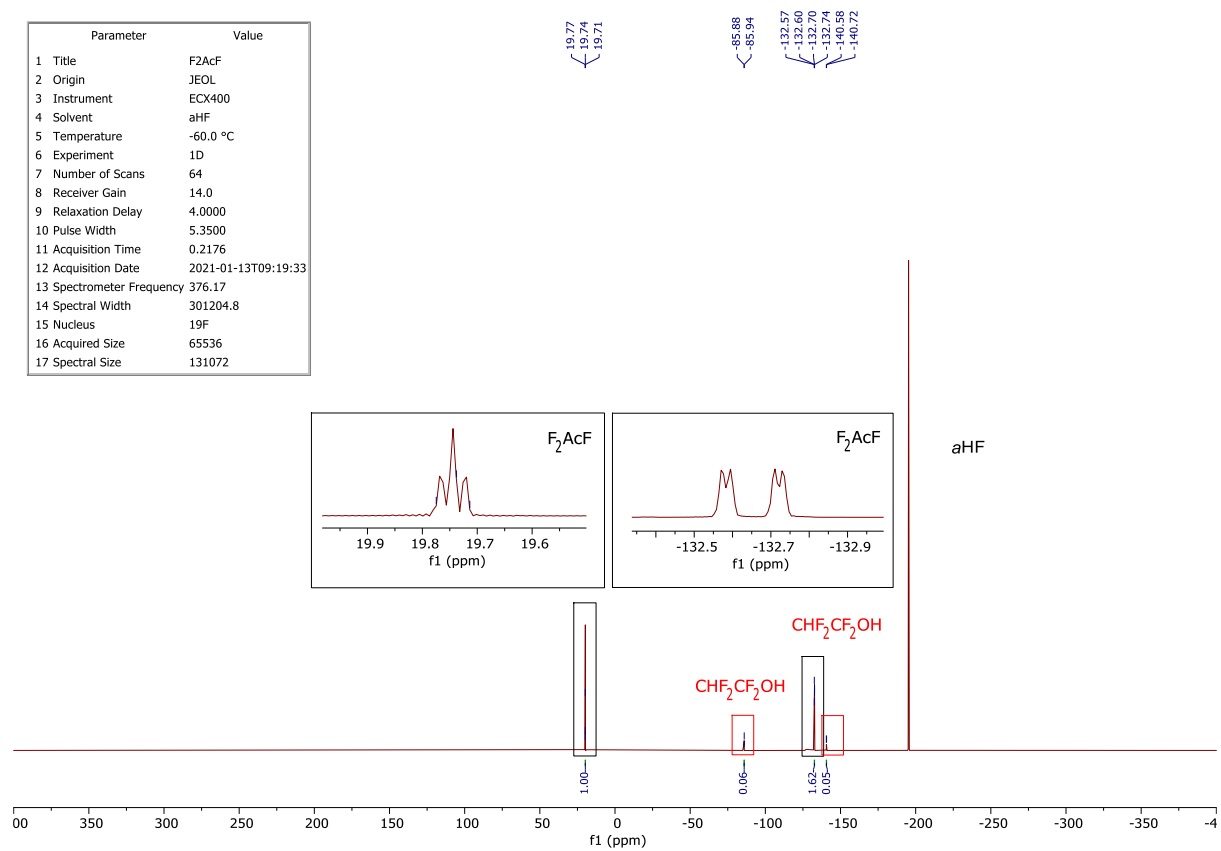

Figure S5. <sup>1</sup>H and <sup>19</sup>F NMR spectra of CHF<sub>2</sub>COF in aHF at -60 °C.

| Parameter                 | Value               |
|---------------------------|---------------------|
| 1 Title                   | FZAcF               |
| 2 Origin                  | JEOL                |
| 3 Instrument              | ECX400              |
| 4 Solvent                 | aHF                 |
| 5 Temperature             | -60.0 °C            |
| 6 Experiment              | 1D                  |
| 7 Number of Scans         | 2004                |
| 8 Receiver Gain           | 58.0                |
| 9 Relaxation Delay        | 1.0000              |
| 10 Pulse Width            | 2.6667              |
| 11 Acquisition Time       | 0.8651              |
| 12 Acquisition Date       | 2021-01-13T11:00:42 |
| 13 Spectrometer Frequency | 100.53              |
| 14 Spectral Width         | 30303.0             |
| 15 Nucleus                | 13C                 |
| 16 Acquired Size          | 32768               |
| 17 Spectral Size          | 52430               |

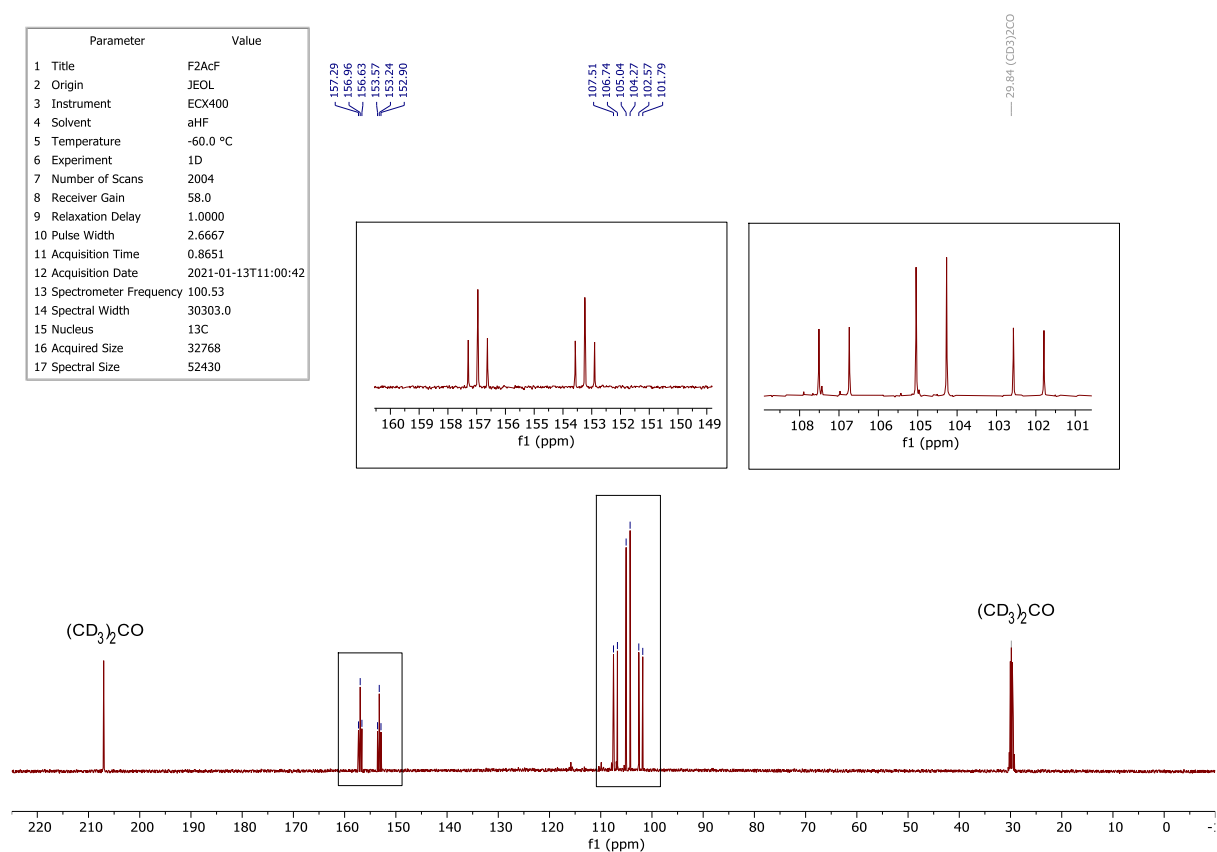

Figure S6. <sup>13</sup>C NMR spectrum of CHF<sub>2</sub>COF in aHF at -60 °C.

CHF<sub>2</sub>COF:

<sup>1</sup>H NMR [400 MHz, (CD<sub>3</sub>)<sub>2</sub>CO]: δ = 5.72 (td, *J* = 51.5, 2.1 Hz, CHF<sub>2</sub>).

<sup>19</sup>F NMR [376 MHz, (CD<sub>3</sub>)<sub>2</sub>CO]: δ = 19.74 (t, *J* = 11.5 Hz, COF), -132.65 (dd, *J* = 50.6, 11.5 Hz, CHF<sub>2</sub>).

<sup>13</sup>C NMR [101 MHz, (CD<sub>3</sub>)<sub>2</sub>CO]: δ = 155.1 (dt, *J* = 374.5, 33.8 Hz, COF), 104.7 (td, *J* = 248.2, 77.7 Hz, CHF<sub>2</sub>).

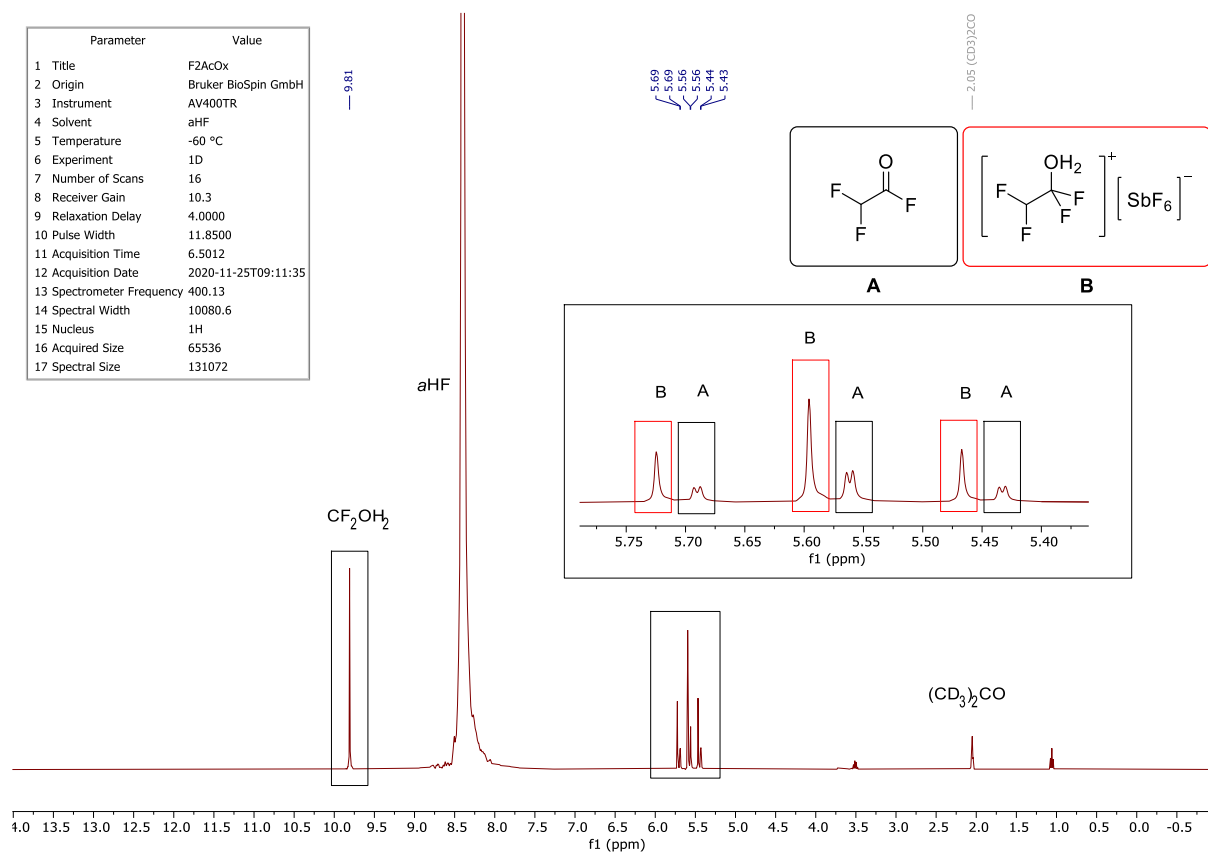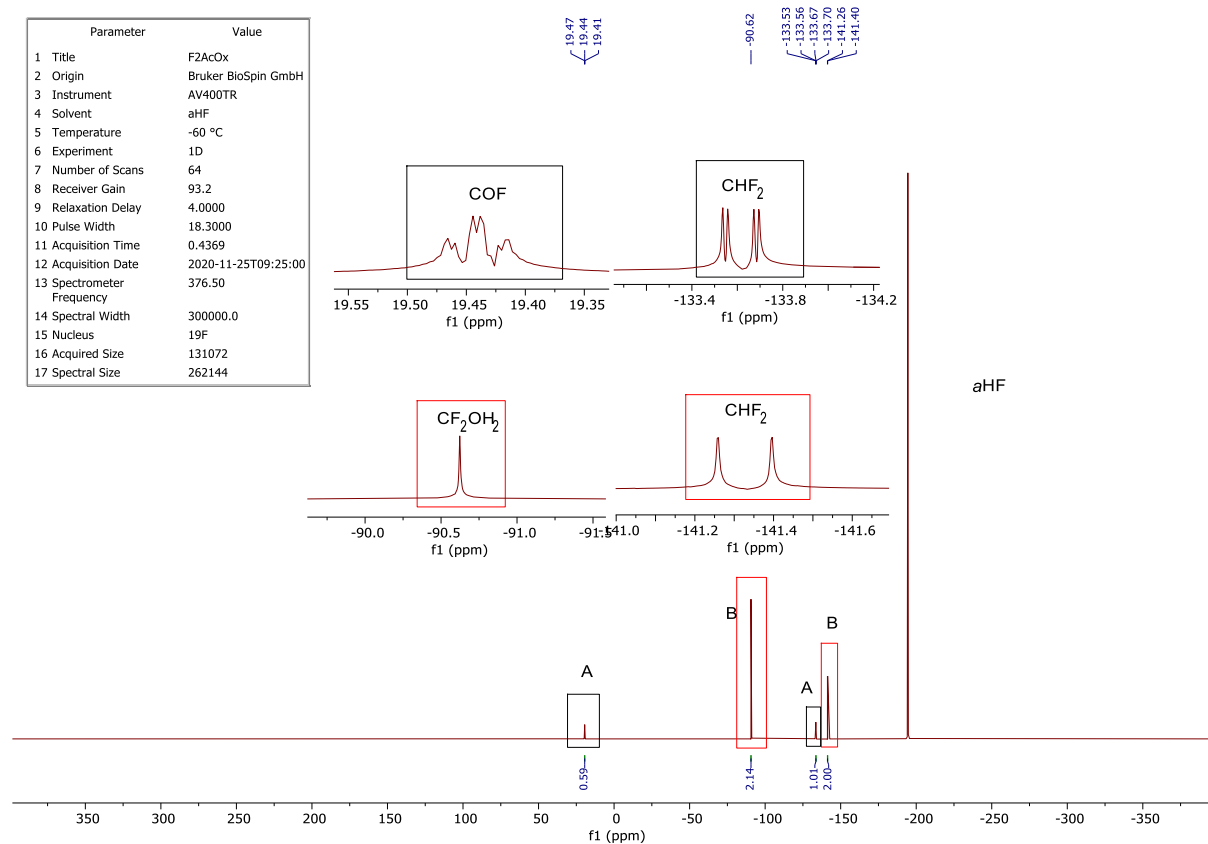

Figure S7. <sup>1</sup>H and <sup>19</sup>F NMR spectra of CH<sub>2</sub>F<sub>2</sub>COF in HF/SbF<sub>5</sub> at -60 °C.

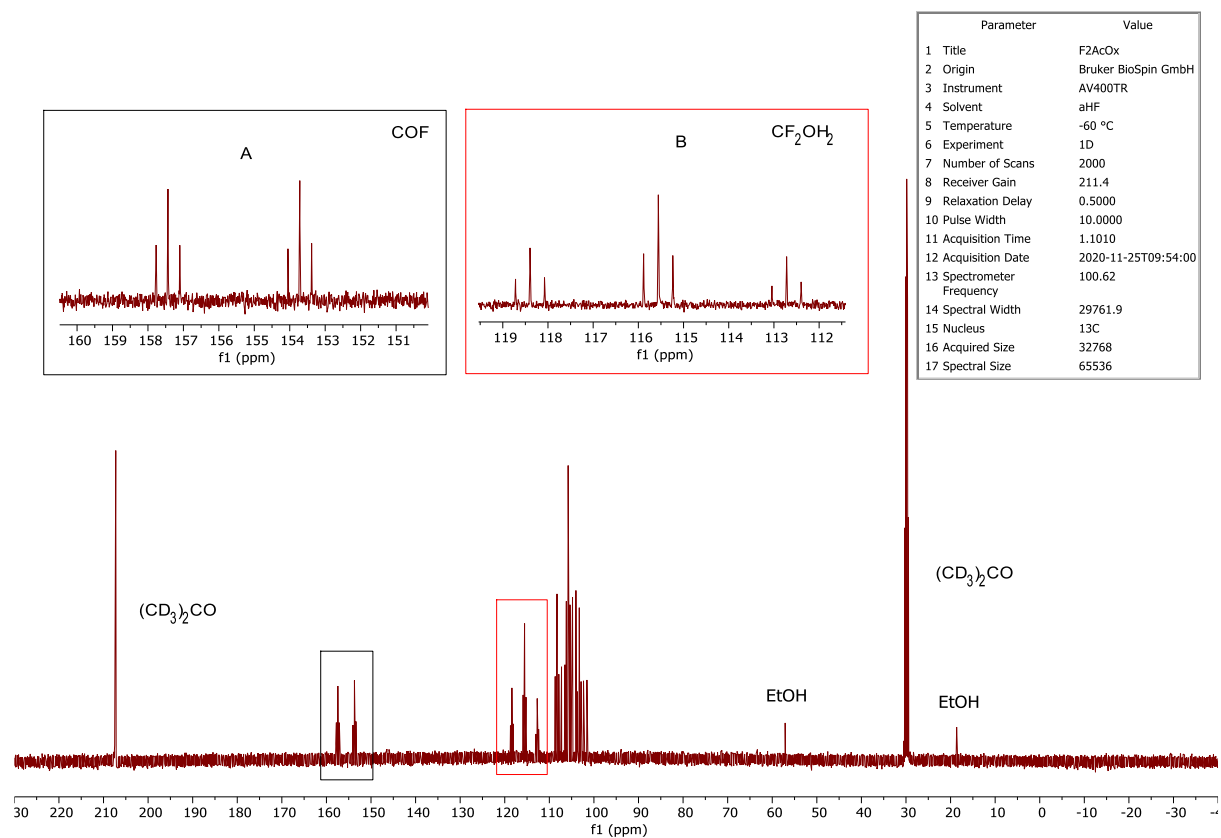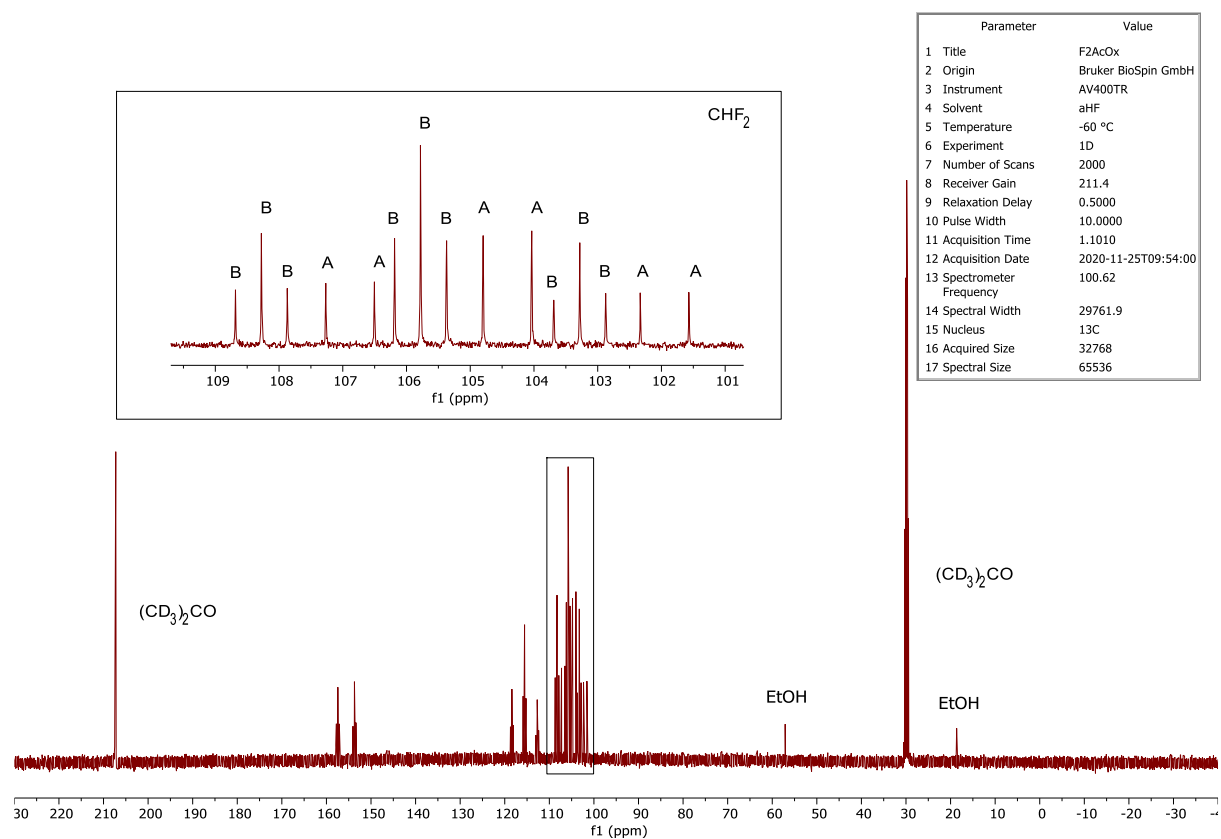

Figure S8.  $^{13}\text{C}$  NMR spectra of  $\text{CHF}_2\text{COF}$  in  $\text{HF}/\text{SbF}_5$  at  $-60^\circ\text{C}$ .

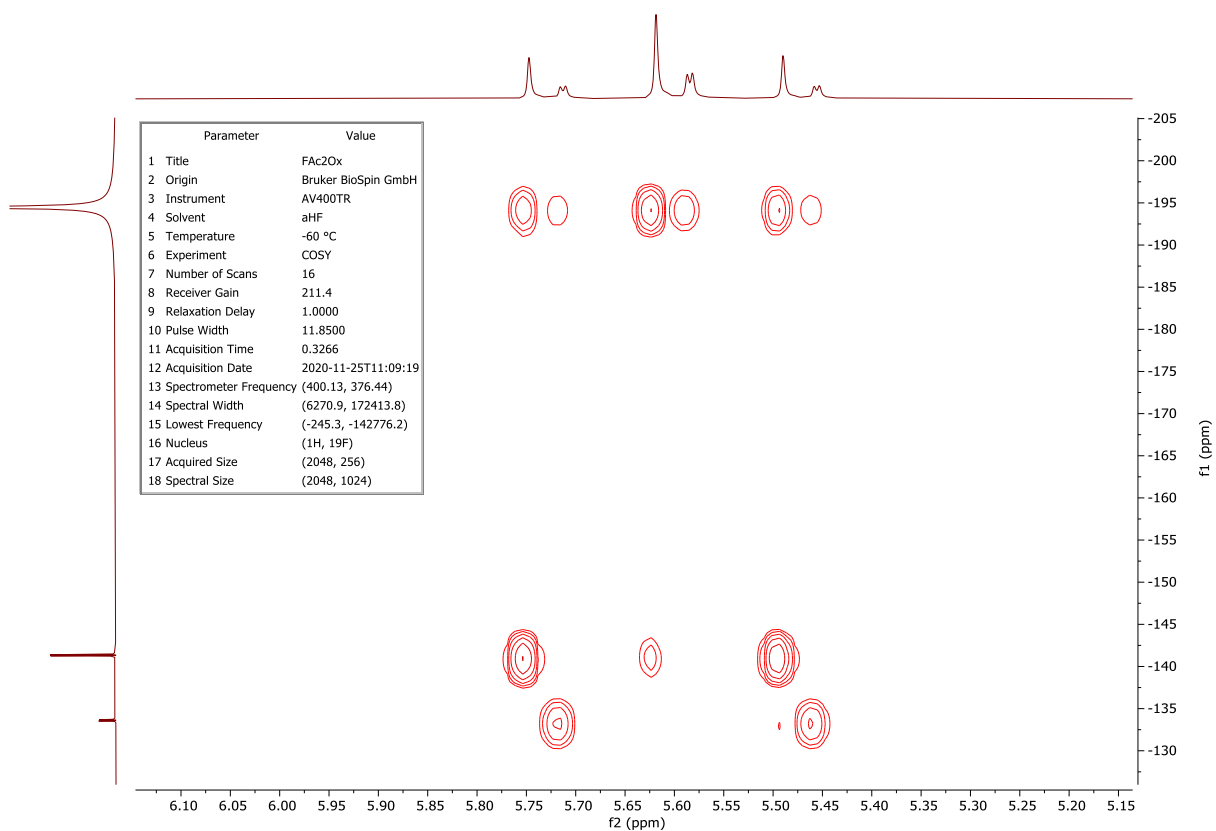

Figure S9.  $^1\text{H}$ - $^{19}\text{F}$ -COSY NMR spectrum of  $\text{CHF}_2\text{COF}$  in  $\text{HF}/\text{SbF}_5$  at  $-60\text{ }^\circ\text{C}$ .

$\text{CHF}_2\text{COF}$  (black):

$^1\text{H}$  NMR [400 MHz,  $(\text{CD}_3)_2\text{CO}$ ]:  $\delta = 5.56$  (td,  $J = 51.5, 2.2$  Hz,  $\text{CHF}_2$ ).

$^{19}\text{F}$  NMR [376 MHz,  $(\text{CD}_3)_2\text{CO}$ ]:  $\delta = 19.43$  (t,  $J = 11.4$  Hz, COF),  $-133.62$  (dd,  $J = 51.5, 12.6$  Hz,  $\text{CHF}_2$ ).

$^{13}\text{C}$  NMR [101 MHz,  $(\text{CD}_3)_2\text{CO}$ ]:  $\delta = 155.6$  (dt,  $J = 374.2, 33.6$  Hz, COF),  $104.4$  (td,  $J = 248.4, 76.7$  Hz,  $\text{CHF}_2$ ).

$[\text{CHF}_2\text{CF}_2\text{OH}_2][\text{SbF}_6^-]$  (red):

$^1\text{H}$  NMR [400 MHz,  $(\text{CD}_3)_2\text{CO}$ ]:  $\delta = 9.81$  (s,  $\text{CF}_2\text{OH}_2$ ),  $5.60$  (t,  $J = 51.5$  Hz,  $\text{CHF}_2$ ).

$^{19}\text{F}$  NMR [376 MHz,  $(\text{CD}_3)_2\text{CO}$ ]:  $\delta = -90.62$  (s,  $\text{CF}_2\text{OH}_2$ ),  $-129.19$  (s,  $[\text{SbF}_6^-]$ ),  $-141.33$  (d,  $J = 51.5$  Hz,  $\text{CHF}_2$ ).

$^{13}\text{C}$  NMR [101 MHz,  $(\text{CD}_3)_2\text{CO}$ ]:  $\delta = 115.6$  (tt,  $J = 285.6, 32.2$  Hz,  $\text{CF}_2\text{OH}_2$ ),  $105.8$  (tt,  $J = 251.1, 40.9$  Hz,  $\text{CHF}_2$ ).

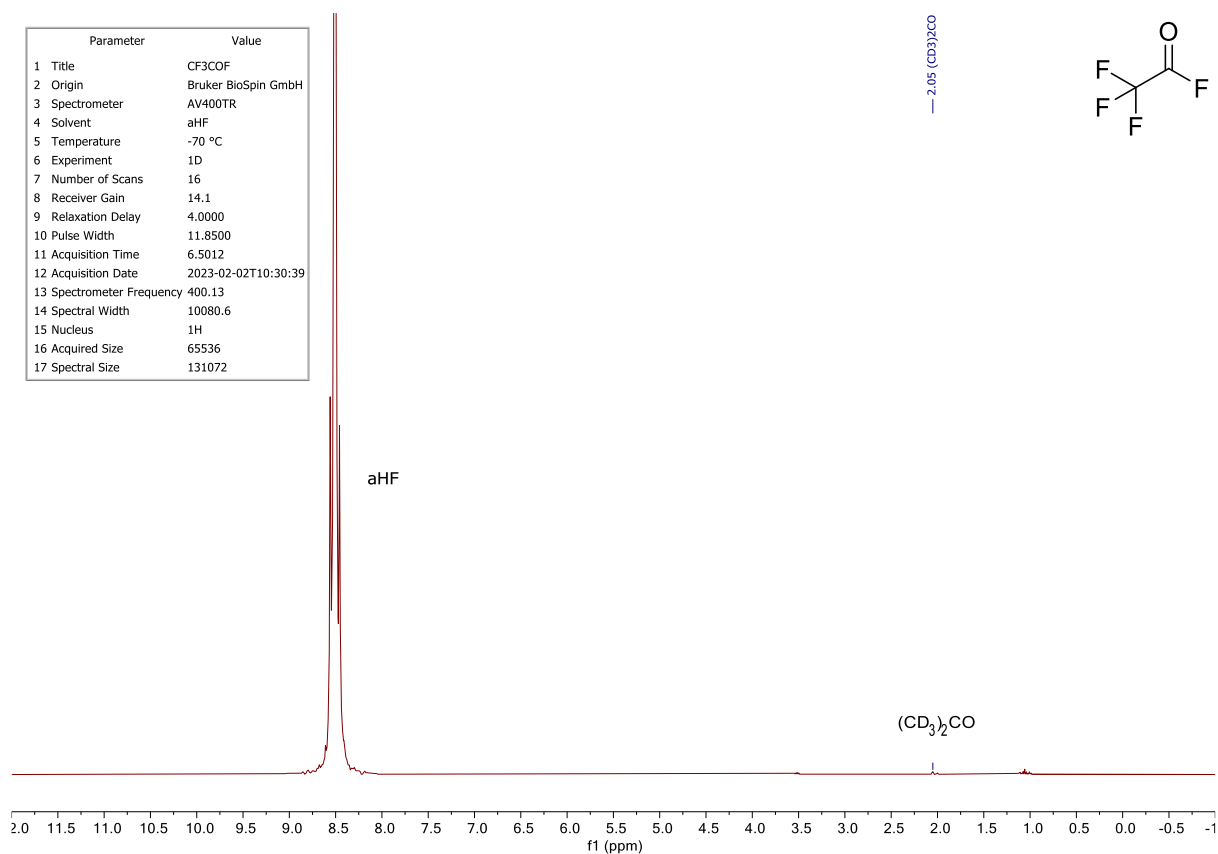

| Parameter                 | Value               |
|---------------------------|---------------------|
| 1 Title                   | CF3COF              |
| 2 Origin                  | Bruker BioSpin GmbH |
| 3 Spectrometer            | AV400TR             |
| 4 Solvent                 | aHF                 |
| 5 Temperature             | -70 °C              |
| 6 Experiment              | 1D                  |
| 7 Number of Scans         | 64                  |
| 8 Receiver Gain           | 57.6                |
| 9 Relaxation Delay        | 4.0000              |
| 10 Pulse Width            | 18.3000             |
| 11 Acquisition Time       | 0.4369              |
| 12 Acquisition Date       | 2023-02-02T15:33:33 |
| 13 Spectrometer Frequency | 376.50              |
| 14 Spectral Width         | 300000.0            |
| 15 Nucleus                | 19F                 |
| 16 Acquired Size          | 131072              |
| 17 Spectral Size          | 262144              |

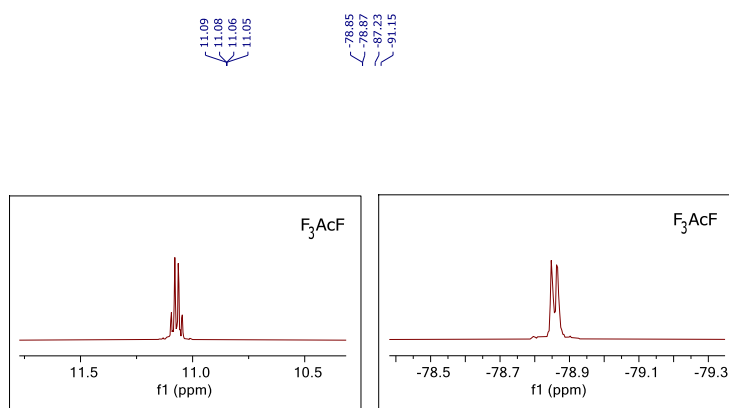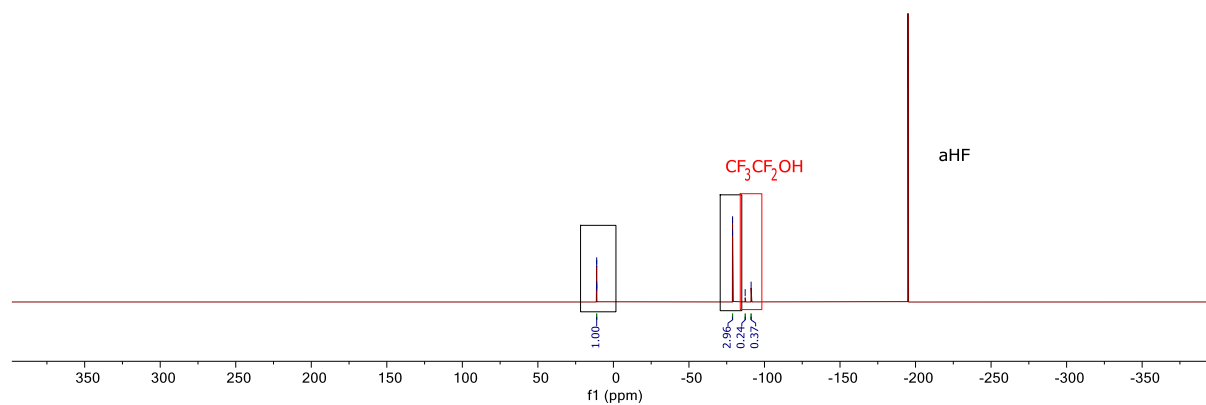

Figure S10.  $^1\text{H}$  and  $^{19}\text{F}$  NMR spectra of  $\text{CF}_3\text{COF}$  in  $\text{aHF}$  at  $-70\text{ }^\circ\text{C}$ .



| Parameter                 | Value               |
|---------------------------|---------------------|
| 1 Title                   | CF <sub>3</sub> COF |
| 2 Origin                  | Bruker BioSpin GmbH |
| 3 Spectrometer            | AV400TR             |
| 4 Solvent                 | aHF                 |
| 5 Temperature             | -70 °C              |
| 6 Experiment              | 1D                  |
| 7 Number of Scans         | 3540                |
| 8 Receiver Gain           | 211.4               |
| 9 Relaxation Delay        | 0.5000              |
| 10 Pulse Width            | 10.0000             |
| 11 Acquisition Time       | 1.1010              |
| 12 Acquisition Date       | 2023-02-02T12:19:34 |
| 13 Spectrometer Frequency | 100.62              |
| 14 Spectral Width         | 29761.9             |
| 15 Nucleus                | <sup>13</sup> C     |
| 16 Acquired Size          | 32768               |
| 17 Spectral Size          | 65536               |

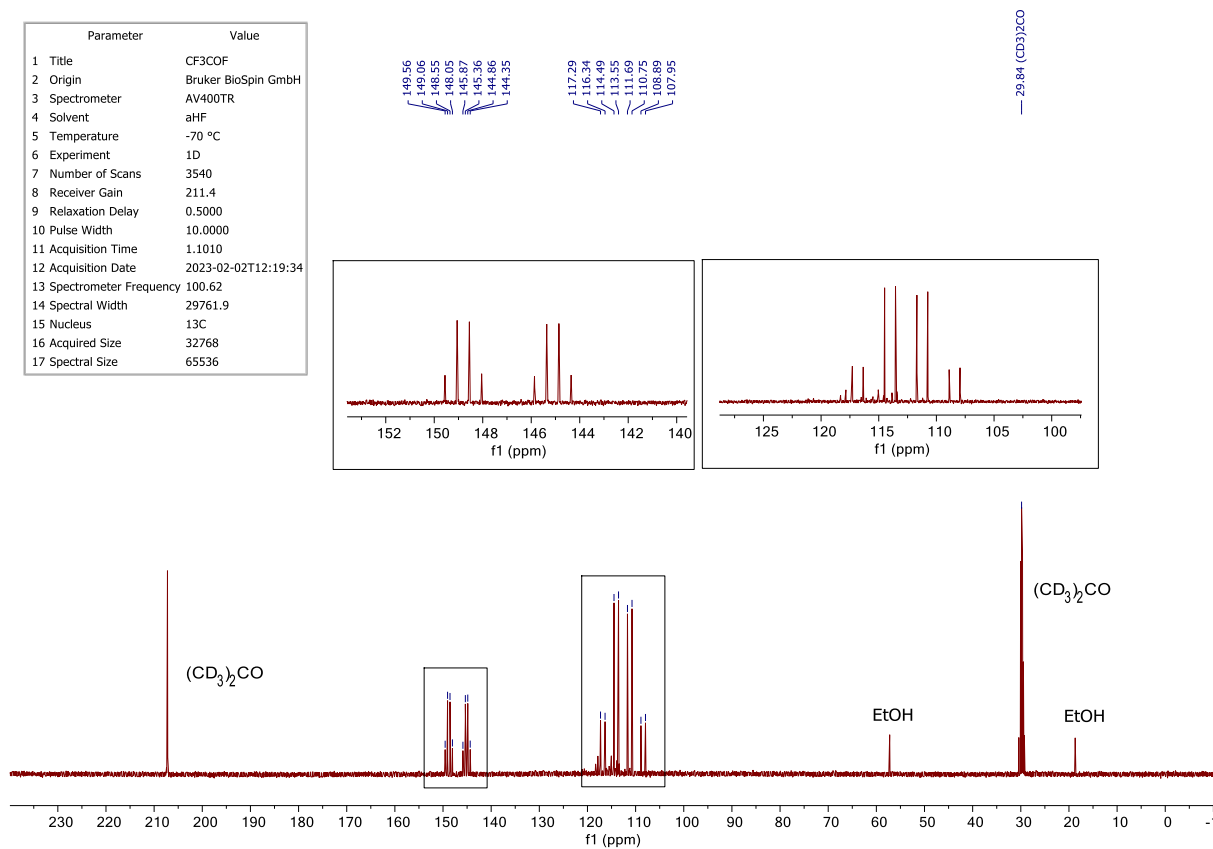

Figure S11. <sup>13</sup>C NMR spectrum of CF<sub>3</sub>COF in aHF at -70 °C.

CF<sub>3</sub>COF:

<sup>19</sup>F NMR [376 MHz, (CD<sub>3</sub>)<sub>2</sub>CO]: δ = 11.07 (q, J = 5.8 Hz, COF), -78.86 (d, J = 5.8 Hz, CF<sub>3</sub>).

<sup>13</sup>C NMR [101 MHz, (CD<sub>3</sub>)<sub>2</sub>CO]: δ = 147.0 (dq, J = 371.5, 50.6 Hz, COF), 112.6 (qd, J = 281.6, 94.9 Hz, CF<sub>3</sub>).

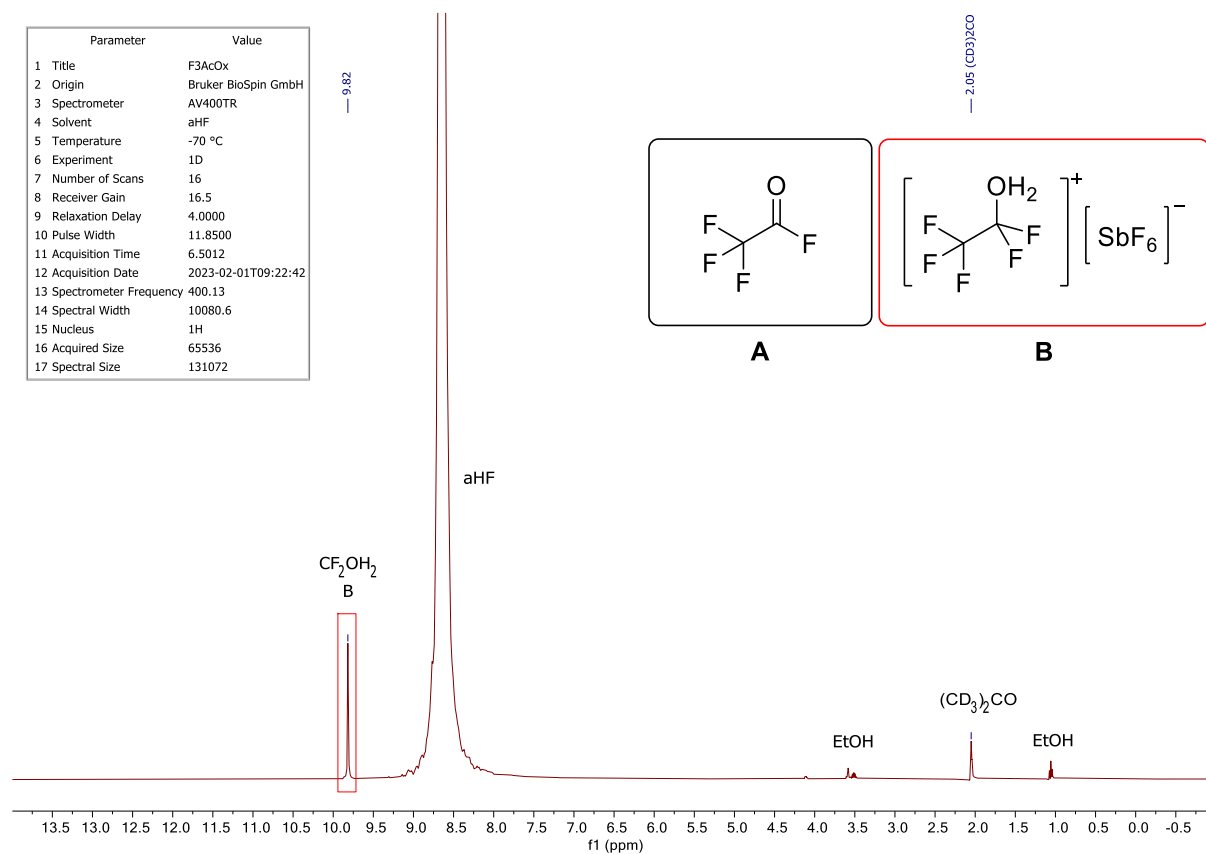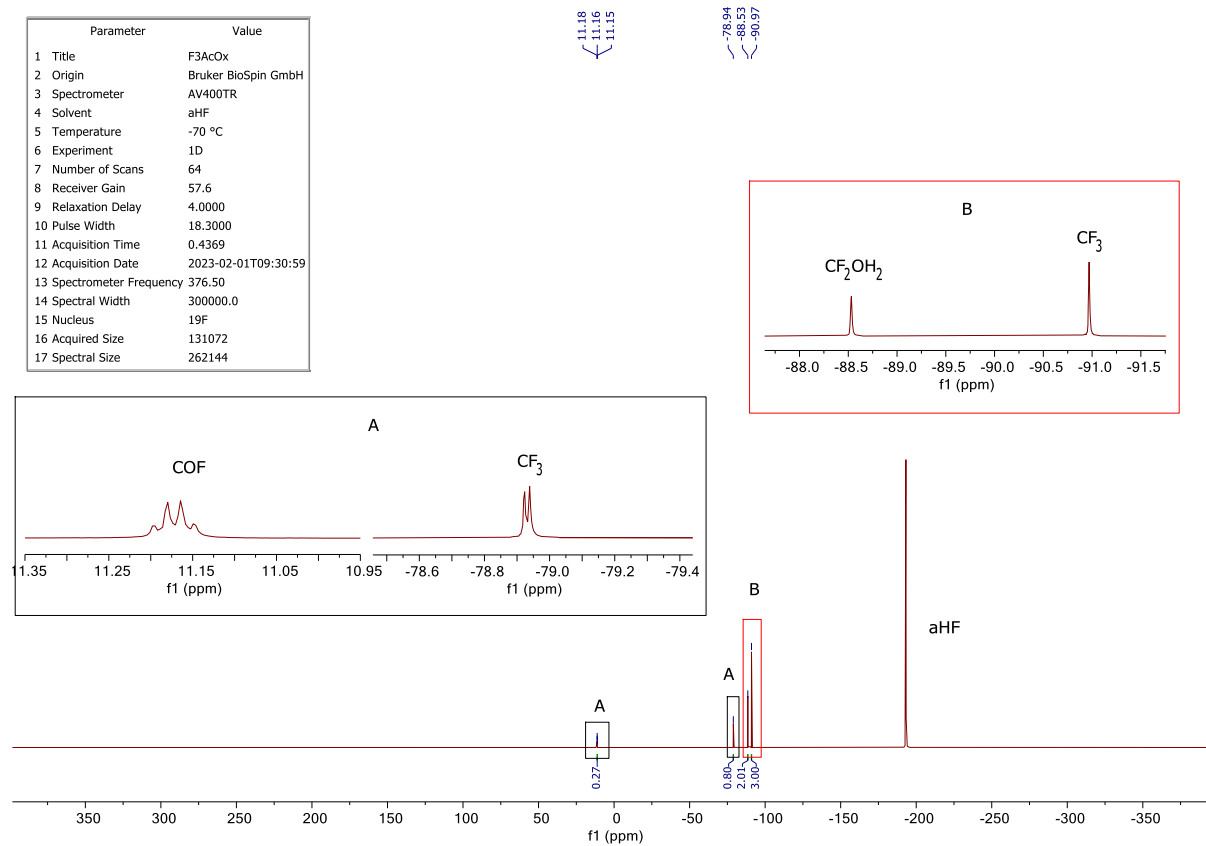

Figure S12. <sup>1</sup>H and <sup>19</sup>F NMR spectra of CF<sub>3</sub>COF in HF/SbF<sub>5</sub> at -70 °C.<sup>17</sup>

| Parameter                 | Value               |
|---------------------------|---------------------|
| 1 Title                   | F3ACox              |
| 2 Origin                  | Bruker BioSpin GmbH |
| 3 Instrument              | AV400TR             |
| 4 Solvent                 | aHF                 |
| 5 Temperature             | -70 °C              |
| 6 Number of Scans         | 5552                |
| 7 Receiver Gain           | 211.4               |
| 8 Relaxation Delay        | 0.5000              |
| 9 Pulse Width             | 10.0000             |
| 10 Acquisition Time       | 1.1010              |
| 11 Acquisition Date       | 2023-02-01T12:07:53 |
| 12 Spectrometer Frequency | 100.62              |
| 13 Spectral Width         | 29761.9             |
| 14 Lowest Frequency       | -4776.2             |
| 15 Nucleus                | 13C                 |
| 16 Acquired Size          | 32768               |
| 17 Spectral Size          | 65536               |

149.09  
148.58  
145.39  
144.89

29.84 (CDCl<sub>3</sub>)CO

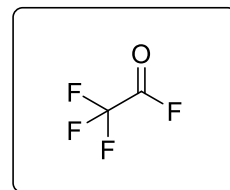

**A**

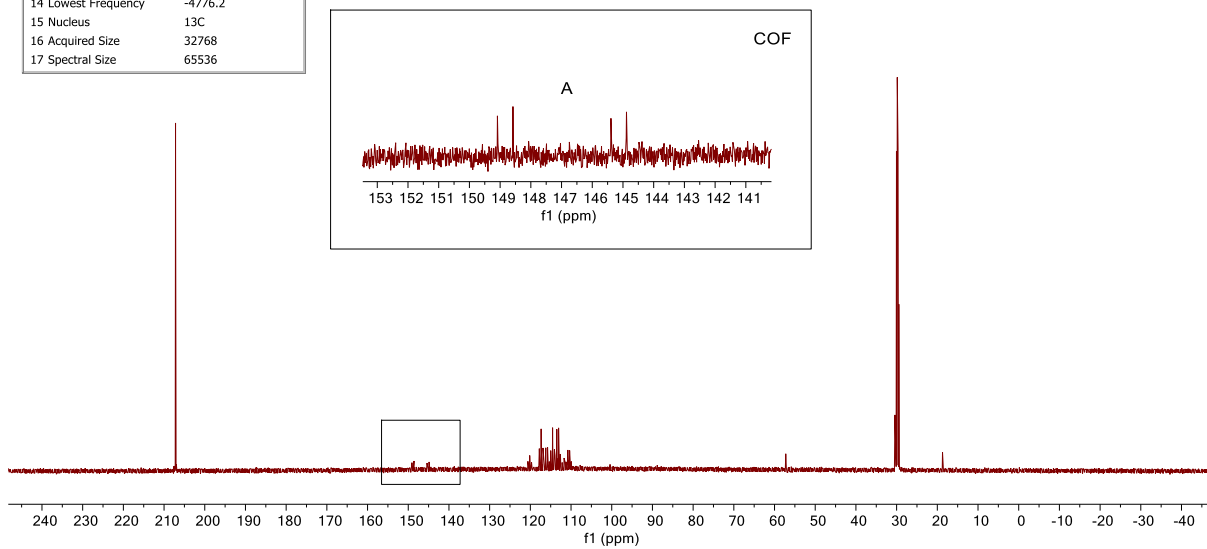

| Parameter                 | Value               |
|---------------------------|---------------------|
| 1 Title                   | F3ACox              |
| 2 Origin                  | Bruker BioSpin GmbH |
| 3 Instrument              | AV400TR             |
| 4 Solvent                 | aHF                 |
| 5 Temperature             | -70 °C              |
| 6 Number of Scans         | 5552                |
| 7 Receiver Gain           | 211.4               |
| 8 Relaxation Delay        | 0.5000              |
| 9 Pulse Width             | 10.0000             |
| 10 Acquisition Time       | 1.1010              |
| 11 Acquisition Date       | 2023-02-01T12:07:53 |
| 12 Spectrometer Frequency | 100.62              |
| 13 Spectral Width         | 29761.9             |
| 14 Lowest Frequency       | -4776.2             |
| 15 Nucleus                | 13C                 |
| 16 Acquired Size          | 32768               |
| 17 Spectral Size          | 65536               |

117.10

116.16

114.30

113.36

111.51

110.57

107.76

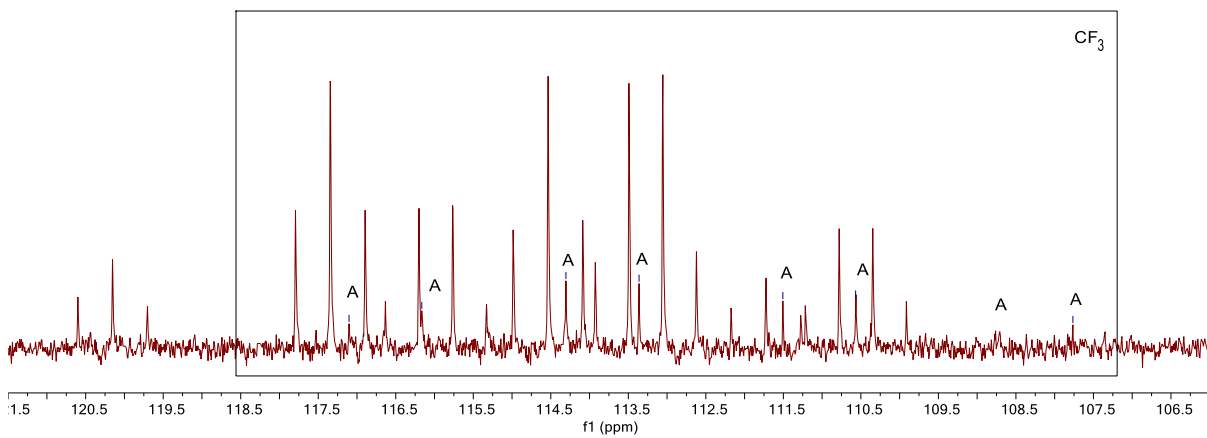

Figure S13. <sup>13</sup>C NMR spectra of CF<sub>3</sub>COF in HF/SbF<sub>5</sub> at -70 °C.<sup>17</sup>

| Parameter                 | Value               |
|---------------------------|---------------------|
| 1 Title                   | F3AcOx              |
| 2 Origin                  | Bruker BioSpin GmbH |
| 3 Instrument              | AV400TR             |
| 4 Solvent                 | aHF                 |
| 5 Temperature             | -70 °C              |
| 6 Number of Scans         | 5552                |
| 7 Receiver Gain           | 211.4               |
| 8 Relaxation Delay        | 0.5000              |
| 9 Pulse Width             | 10.0000             |
| 10 Acquisition Time       | 1.1010              |
| 11 Acquisition Date       | 2023-02-01T12:07:53 |
| 12 Spectrometer Frequency | 100.62              |
| 13 Spectral Width         | 29761.9             |
| 14 Lowest Frequency       | -4776.2             |
| 15 Nucleus                | 13C                 |
| 16 Acquired Size          | 32768               |
| 17 Spectral Size          | 65536               |

120.60 120.15 119.71  
 117.79 117.34 116.90  
 114.99 114.53 114.08

112.17 111.72

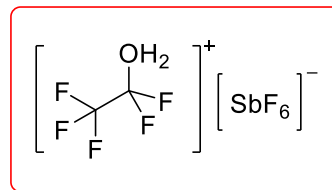

**B**

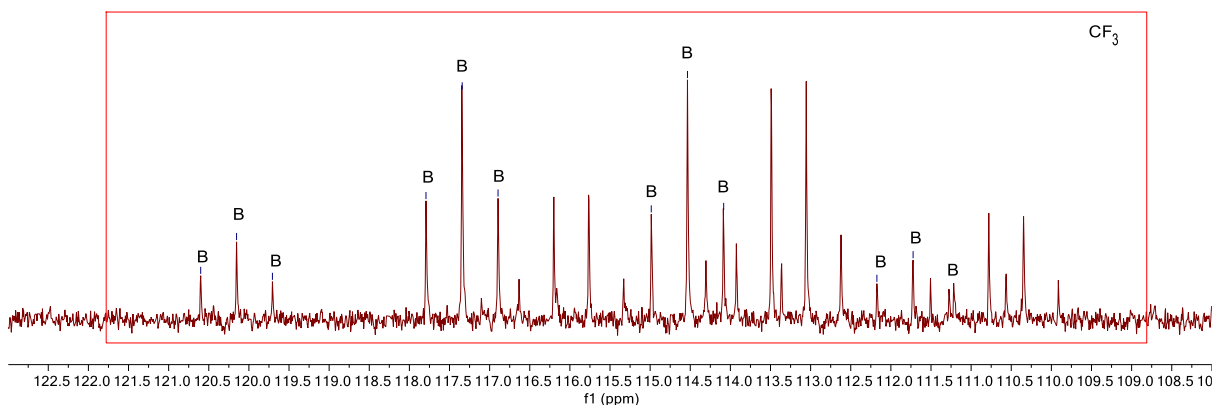

| Parameter                 | Value               |
|---------------------------|---------------------|
| 1 Title                   | F3AcOx              |
| 2 Origin                  | Bruker BioSpin GmbH |
| 3 Instrument              | AV400TR             |
| 4 Solvent                 | aHF                 |
| 5 Temperature             | -70 °C              |
| 6 Number of Scans         | 5552                |
| 7 Receiver Gain           | 211.4               |
| 8 Relaxation Delay        | 0.5000              |
| 9 Pulse Width             | 10.0000             |
| 10 Acquisition Time       | 1.1010              |
| 11 Acquisition Date       | 2023-02-01T12:07:53 |
| 12 Spectrometer Frequency | 100.62              |
| 13 Spectral Width         | 29761.9             |
| 14 Lowest Frequency       | -4776.2             |
| 15 Nucleus                | 13C                 |
| 16 Acquired Size          | 32768               |
| 17 Spectral Size          | 65536               |

116.63 116.20 115.76 115.33

113.93 113.49 113.05 112.62

111.21 110.78 110.35 109.91

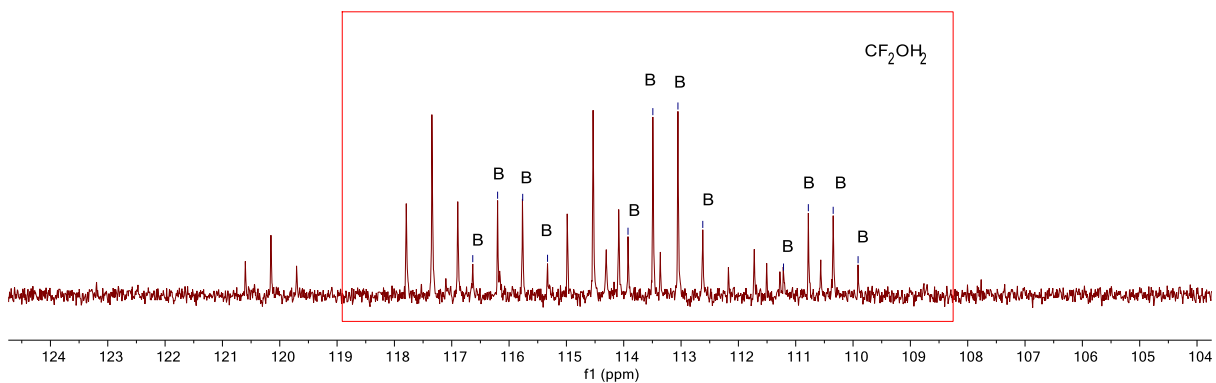

Figure S14. <sup>13</sup>C NMR spectra of CF<sub>3</sub>COF in HF/SbF<sub>5</sub> at -70 °C.<sup>17</sup>

CF<sub>3</sub>COF (black):

<sup>19</sup>F NMR [376 MHz, (CD<sub>3</sub>)<sub>2</sub>CO]: δ = 11.17 (q, J = 5.7 Hz, COF), -78.93 (d, J = 5.7 Hz, CF<sub>3</sub>).

<sup>13</sup>C NMR [101 MHz, (CD<sub>3</sub>)<sub>2</sub>CO]: δ = 147.0 (dd, J = 372.2, 50.6 Hz, COF), 112.4 (qd, J = 281.3, 94.5 Hz, CF<sub>3</sub>).

[CF<sub>3</sub>CF<sub>2</sub>OH<sub>2</sub>][SbF<sub>6</sub>] (red):

<sup>1</sup>H NMR [400 MHz, (CD<sub>3</sub>)<sub>2</sub>CO]: δ = 9.82 (s, CF<sub>2</sub>OH<sub>2</sub>).

<sup>19</sup>F NMR [376 MHz, (CD<sub>3</sub>)<sub>2</sub>CO]: δ = -88.53 (s, CF<sub>2</sub>OH<sub>2</sub>), -90.97 (s, CF<sub>3</sub>), -128.48 (s, [SbF<sub>6</sub>]<sup>-</sup>).

<sup>13</sup>C NMR [101 MHz, (CD<sub>3</sub>)<sub>2</sub>CO]: δ = 115.9 (qt, J = 282.9, 45.0 Hz, CF<sub>3</sub>), 113.3 (tq, J = 272.6, 43.7 Hz, CF<sub>2</sub>OH<sub>2</sub>).

## Quantum Chemical Calculations

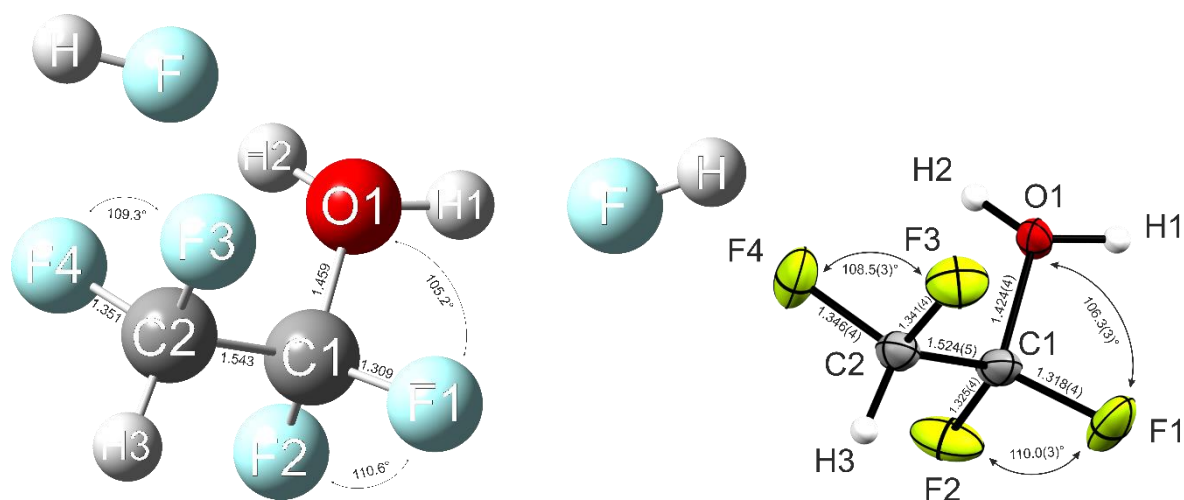

**Figure S15.** Calculated gas phase structure of  $[\text{CHF}_2\text{CF}_2\text{OH}_2]^+\cdot 2\text{HF}$ . Bond lengths are given in [Å]. Calculated at the  $\omega\text{B97XD/aug-cc-pVTZ}$ -level of theory.

**Table S6.** Standard orientations of  $\text{CHF}_2\text{COF}$ .

| <b>CHF<sub>2</sub>COF</b>        |                 |           |           |                 |                 |           |           |
|----------------------------------|-----------------|-----------|-----------|-----------------|-----------------|-----------|-----------|
| $\omega\text{B97XD/aug-cc-pVTZ}$ |                 |           |           | MP2/aug-cc-pVTZ |                 |           |           |
| Atom                             | Coordinates [Å] |           |           | Atom            | Coordinates [Å] |           |           |
|                                  | X               | Y         | Z         |                 | X               | Y         | Z         |
| F                                | 0.934053        | 1.027379  | 0.652619  | F               | -1.001457       | 1.206921  | 0.009687  |
| O                                | 1.743417        | -0.702603 | -0.441611 | O               | -1.701270       | -0.881980 | -0.007078 |
| C                                | 0.813814        | -0.080707 | -0.088554 | C               | -0.814944       | -0.108204 | -0.000988 |
| C                                | -0.662753       | -0.341502 | -0.351587 | C               | 0.675906        | -0.463051 | -0.003975 |
| F                                | -1.199666       | -0.829486 | 0.786875  | F               | 1.258593        | 0.074352  | -1.092910 |
| F                                | -1.295971       | 0.819634  | -0.622324 | F               | 1.258302        | 0.055203  | 1.094320  |
| H                                | -0.800049       | -1.003665 | -1.180797 | H               | 0.805446        | -1.544928 | -0.013464 |

**Table S7.** Standard orientations of  $\text{CF}_3\text{COF}$ .

| <b>CF<sub>3</sub>COF</b>         |                 |           |           |                 |                 |           |           |
|----------------------------------|-----------------|-----------|-----------|-----------------|-----------------|-----------|-----------|
| $\omega\text{B97XD/aug-cc-pVTZ}$ |                 |           |           | MP2/aug-cc-pVTZ |                 |           |           |
| Atom                             | Coordinates [Å] |           |           | Atom            | Coordinates [Å] |           |           |
|                                  | X               | Y         | Z         |                 | X               | Y         | Z         |
| F                                | 1.541514        | 1.022314  | -0.014292 | F               | 1.505837        | -1.048963 | -0.000008 |
| O                                | 1.517571        | -1.180516 | 0.007925  | O               | 1.557370        | 1.156790  | -0.000008 |
| C                                | 0.934020        | -0.158898 | -0.002362 | C               | 0.949285        | 0.155117  | -0.000010 |
| C                                | -0.590757       | -0.005234 | -0.004040 | C               | -0.592042       | 0.016548  | -0.000006 |
| F                                | -1.090790       | -0.521112 | 1.135232  | F               | -0.986025       | -0.651555 | -1.081120 |
| F                                | -0.905509       | 1.303253  | -0.057120 | F               | -0.986007       | -0.651201 | 1.081342  |
| F                                | -1.123008       | -0.645687 | -1.066597 | F               | -1.156297       | 1.209018  | -0.000196 |

**Table S8.** Standard orientations of  $[\text{CHF}_2\text{CF}_2\text{OH}_2]^+\cdot 2\text{HF}$  and  $[\text{CF}_3\text{CF}_2\text{OH}_2]^+\cdot 2\text{HF}$ .

| $[\text{CHF}_2\text{CF}_2\text{OH}_2]^+\cdot 2\text{HF}$ |                 |           |           | $[\text{CF}_3\text{CF}_2\text{OH}_2]^+\cdot 2\text{HF}$ |                 |           |           |
|----------------------------------------------------------|-----------------|-----------|-----------|---------------------------------------------------------|-----------------|-----------|-----------|
| $\omega\text{B97XD/ aug-cc-pVTZ}$                        |                 |           |           | $\omega\text{B97XD/ aug-cc-pVTZ}$                       |                 |           |           |
| Atom                                                     | Coordinates [Å] |           |           | Atom                                                    | Coordinates [Å] |           |           |
|                                                          | X               | Y         | Z         |                                                         | X               | Y         | Z         |
| F                                                        | -0.351135       | 2.663226  | -0.177546 | F                                                       | 2.372447        | -2.017225 | -0.335153 |
| F                                                        | 1.706275        | -1.077677 | -1.153021 | F                                                       | -0.551544       | -1.080263 | 1.458106  |
| F                                                        | -0.377965       | -1.731401 | 0.420533  | O                                                       | 1.091485        | 0.000464  | 0.480497  |
| F                                                        | -0.041857       | -1.731401 | 1.649537  | C                                                       | -1.189510       | -0.000366 | -0.538069 |
| O                                                        | -0.627897       | 0.247900  | -0.496373 | C                                                       | -0.344182       | -0.000424 | 0.743629  |
| F                                                        | 1.955394        | -0.799121 | -0.070855 | H                                                       | 1.476126        | 0.843662  | 0.093708  |
| C                                                        | 1.592428        | -0.491663 | 0.047262  | F                                                       | -0.552826       | 1.078176  | 1.459386  |
| C                                                        | 0.121803        | -0.511870 | 0.446741  | H                                                       | 1.476801        | -0.842324 | 0.093813  |
| H                                                        | 2.121712        | -0.867185 | 0.671287  | F                                                       | 2.368480        | 2.020976  | -0.332500 |
| H                                                        | -1.460390       | -0.051904 | -0.552685 | H                                                       | 2.104339        | 2.806924  | -0.474333 |
| H                                                        | -0.503529       | 1.073225  | -0.489790 | H                                                       | 2.109909        | -2.811767 | -0.734303 |
| F                                                        | -2.994009       | -0.465080 | -0.499114 | F                                                       | -2.488122       | -0.002353 | -0.169151 |
| H                                                        | -0.928316       | 3.151159  | 0.273214  | F                                                       | -0.947828       | 1.121193  | -1.249543 |
| H                                                        | -3.562010       | -1.132651 | -0.420859 | F                                                       | -0.944707       | -1.120001 | -1.251503 |

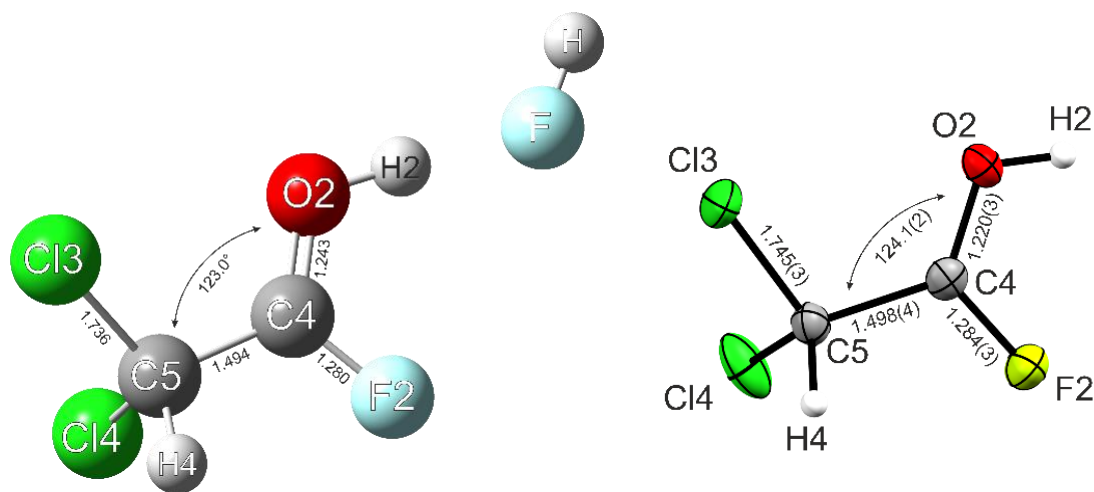

**Figure S16.** Calculated gas phase structure of  $[\text{CCl}_2\text{C}(\text{OH})\text{F}]^+\cdot\text{HF}$ ,  $[\text{CH}_2\text{FC}(\text{OH})\text{F}]^+\cdot\text{HF}$  and  $[\text{CCl}_2\text{HC}(\text{OH})\text{F}]^+\cdot\text{HF}$ . Bond lengths are given in [Å]. Calculated at the MP2/aug-cc-pVTZ-level of theory.<sup>18</sup>

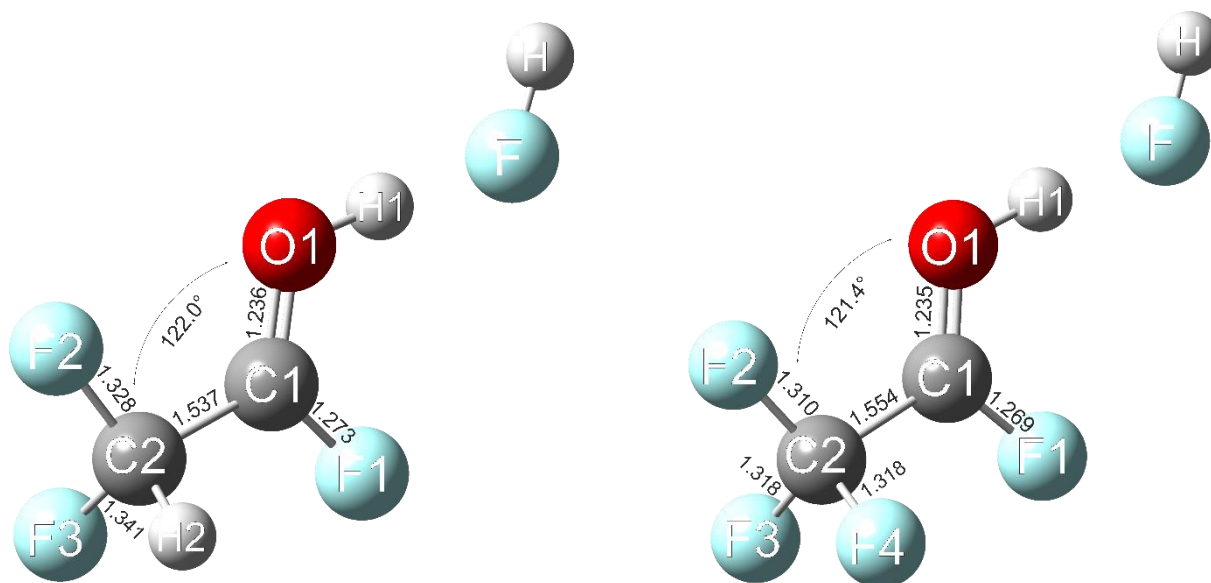

**Figure S17.** Calculated gas-phase structure of  $[\text{CHF}_2\text{C}(\text{OH})\text{F}]^+\cdot\text{HF}$  and  $[\text{CF}_3\text{C}(\text{OH})\text{F}]^+\cdot\text{HF}$ . Bond lengths are given in [Å]. Calculated at the MP2/aug-cc-pVTZ-level of theory.

**Table S9.** Standard orientations of  $\text{CCl}_2\text{HCOF}$ . Calculated at the MP2/aug-cc-pVTZ-level of theory.

| $\text{CCl}_2\text{HCOF}$ |                 |           |           |      |                 |           |           |
|---------------------------|-----------------|-----------|-----------|------|-----------------|-----------|-----------|
| Atom                      | Coordinates [Å] |           |           | Atom | Coordinates [Å] |           |           |
|                           | X               | Y         | Z         |      | X               | Y         | Z         |
| Cl                        | -1.076569       | -1.445766 | 0.004091  | C    | 1.224440        | -0.026936 | -0.099340 |
| Cl                        | -0.989599       | 1.498655  | 0.060117  | C    | -0.227538       | 0.012408  | -0.539772 |
| F                         | 1.355215        | -0.111386 | 1.218811  | H    | -0.256977       | 0.034945  | -1.621337 |
| O                         | 2.150436        | 0.019448  | -0.825604 |      |                 |           |           |

**Table S10.** Standard orientations of  $[\text{CCl}_2\text{HC}(\text{OH})\text{F}]^+\cdot\text{HF}$ . Calculated at the MP2/aug-cc-pVTZ-level of theory.

| $[\text{CCl}_2\text{HC}(\text{OH})\text{F}]^+\cdot\text{HF}$ |                 |           |           |      |                 |           |           |
|--------------------------------------------------------------|-----------------|-----------|-----------|------|-----------------|-----------|-----------|
| Atom                                                         | Coordinates [Å] |           |           | Atom | Coordinates [Å] |           |           |
|                                                              | X               | Y         | Z         |      | X               | Y         | Z         |
| F                                                            | 3.600136        | 0.210534  | -0.392221 | C    | 0.475431        | -0.069340 | 0.404939  |
| Cl                                                           | -1.687039       | 1.470255  | 0.006152  | C    | -1.015404       | -0.051081 | 0.503769  |
| Cl                                                           | -1.429455       | -1.414090 | -0.559956 | H    | -1.319919       | -0.299024 | 1.518026  |
| F                                                            | 1.096699        | -0.904421 | 1.149372  | H    | 2.113623        | 0.489556  | -0.401840 |
| O                                                            | 1.111181        | 0.652636  | -0.381464 | H    | 4.265573        | 0.601075  | -0.916416 |



**Table S11.** Standard orientations of  $[\text{CHF}_2\text{C}(\text{OH})\text{F}]^+\text{-HF}$ .

| $[\text{CHF}_2\text{C}(\text{OH})\text{F}]^+\text{-HF}$ |                 |           |           |                          |                 |           |           |
|---------------------------------------------------------|-----------------|-----------|-----------|--------------------------|-----------------|-----------|-----------|
| $\omega\text{B97XD/aug-cc-pVTZ}$                        |                 |           |           | $\text{MP2/aug-cc-pVTZ}$ |                 |           |           |
| Atom                                                    | Coordinates [Å] |           |           | Atom                     | Coordinates [Å] |           |           |
|                                                         | X               | Y         | Z         |                          | X               | Y         | Z         |
| F                                                       | -3.235917       | -0.135312 | -0.166721 | F                        | -3.235917       | -0.135312 | -0.166721 |
| F                                                       | -0.430602       | 1.374870  | 0.321046  | F                        | -0.135312       | 1.374870  | 0.321046  |
| O                                                       | -0.801150       | -0.741137 | -0.015966 | O                        | -0.801150       | -0.741137 | -0.015966 |
| C                                                       | -0.017095       | 0.185293  | 0.188190  | C                        | -0.017095       | 0.185293  | 0.188190  |
| C                                                       | 1.507863        | -0.037070 | 0.302837  | C                        | 1.507863        | -0.037070 | 0.302837  |
| H                                                       | -1.791800       | -0.515106 | -0.048259 | H                        | -1.791800       | -0.515106 | -0.048259 |
| H                                                       | -3.950343       | -0.684357 | -0.395026 | H                        | -3.950343       | -0.684357 | -0.395026 |
| F                                                       | 1.759039        | -1.314044 | 0.073035  | F                        | 1.759039        | -1.314044 | 0.073035  |
| F                                                       | 2.058502        | 0.738782  | -0.631847 | F                        | 2.058502        | 0.738782  | -0.631847 |
| H                                                       | 1.847538        | 0.260554  | 1.301240  | H                        | 1.847538        | 0.260554  | 1.301240  |

**Table S12.** Standard orientations of  $[\text{CF}_3\text{C}(\text{OH})\text{F}]^+\text{-HF}$ .

| $[\text{CF}_3\text{C}(\text{OH})\text{F}]^+\text{-HF}$ |                 |           |           |                          |                 |           |           |
|--------------------------------------------------------|-----------------|-----------|-----------|--------------------------|-----------------|-----------|-----------|
| $\omega\text{B97XD/aug-cc-pVTZ}$                       |                 |           |           | $\text{MP2/aug-cc-pVTZ}$ |                 |           |           |
| Atom                                                   | Coordinates [Å] |           |           | Atom                     | Coordinates [Å] |           |           |
|                                                        | X               | Y         | Z         |                          | X               | Y         | Z         |
| F                                                      | -3.476771       | -0.094824 | -0.019155 | F                        | 3.484095        | 0.094923  | 0.000649  |
| F                                                      | -0.618953       | 1.322108  | -0.039932 | F                        | 0.608713        | -1.373546 | -0.000323 |
| O                                                      | -1.043765       | -0.803385 | 0.082526  | O                        | 1.070268        | 0.753741  | -0.000709 |
| C                                                      | -0.217638       | 0.115413  | 0.019816  | C                        | 0.251220        | -0.162336 | -0.000301 |
| C                                                      | 1.262479        | -0.111034 | -0.027982 | C                        | -1.290007       | 0.114609  | 0.000034  |
| H                                                      | -2.017940       | -0.540605 | 0.042523  | H                        | 2.062588        | 0.507019  | -0.000665 |
| H                                                      | -4.235675       | -0.629678 | -0.022559 | H                        | 4.231273        | 0.648619  | -0.001649 |
| F                                                      | 1.667011        | -0.704406 | 1.115155  | F                        | -1.491742       | 1.403970  | -0.001719 |
| F                                                      | 1.715415        | 1.160716  | -0.027884 | F                        | -1.778943       | -0.444300 | 1.084096  |
| F                                                      | 1.639374        | -0.842362 | -1.098314 | F                        | -1.780262       | -0.447626 | -1.081636 |

**Table S13.** Calculated NPA charges of  $\text{CCl}_2\text{HCOF}$ ,  $\text{CHF}_2\text{COF}$ ,  $\text{CF}_3\text{COF}$ ,  $[\text{CCl}_2\text{HC(OH)F}]^+\cdot\text{HF}$ ,  $[\text{CHF}_2\text{C(OH)F}]^+\cdot\text{HF}$ , and  $[\text{CF}_3\text{C(OH)F}]^+\cdot\text{HF}$ . Calculated at the MP2/aug-cc-pVTZ-level of theory.

| <b><math>\text{CCl}_2\text{HCOF}</math></b> |            | <b><math>[\text{CCl}_2\text{HC(OH)F}]^+\cdot\text{HF}</math></b> |            |
|---------------------------------------------|------------|------------------------------------------------------------------|------------|
| Atom                                        | NPA charge | Atom                                                             | NPA charge |
|                                             |            | F1                                                               | -0.563     |
| Cl1                                         | 0.005      | Cl2                                                              | 0.099      |
| Cl2                                         | 0.005      | Cl3                                                              | 0.082      |
| F3                                          | -0.377     | F4                                                               | -0.289     |
| O4                                          | -0.584     | O5                                                               | -0.618     |
| C5                                          | 0.991      | C6                                                               | 1.155      |
| C6                                          | -0.264     | C7                                                               | -0.317     |
| H7                                          | 0.223      | H8                                                               | 0.259      |
|                                             |            | H9                                                               | 0.577      |
|                                             |            | H10                                                              | 0.615      |
| <b><math>\text{CHF}_2\text{COF}</math></b>  |            | <b><math>[\text{CHF}_2\text{C(OH)F}]^+\cdot\text{HF}</math></b>  |            |
| Atom                                        | NPA charge | Atom                                                             | NPA charge |
|                                             |            | F                                                                | -0.559     |
| F                                           | -0.370     | F                                                                | -0.270     |
| O                                           | -0.578     | O                                                                | -0.602     |
| C                                           | 0.948      | C                                                                | 1.107      |
| C                                           | 0.604      | C                                                                | 0.606      |
|                                             |            | H                                                                | 0.580      |
|                                             |            | H                                                                | 0.619      |
| F                                           | -0.372     | F                                                                | -0.327     |
| F                                           | -0.372     | F                                                                | -0.333     |
| H                                           | 0.139      | H                                                                | 0.180      |
| <b><math>\text{CF}_3\text{COF}</math></b>   |            | <b><math>[\text{CF}_3\text{C(OH)F}]^+\cdot\text{HF}</math></b>   |            |
| Atom                                        | NPA charge | Atom                                                             | NPA charge |
|                                             |            | F1                                                               | -0.557     |
| F1                                          | -0.365     | F2                                                               | -0.267     |
| O2                                          | -0.549     | O3                                                               | -0.597     |
| C3                                          | 0.921      | C4                                                               | 1.089      |
| C4                                          | 1.043      | C5                                                               | 1.067      |
|                                             |            | H6                                                               | 0.582      |
|                                             |            | H7                                                               | 0.621      |
| F7                                          | -0.343     | F8                                                               | -0.309     |
| F6                                          | -0.354     | F9                                                               | -0.315     |
| F5                                          | -0.354     | F10                                                              | -0.315     |

**Table S14.** Selected energies of donor-acceptor interactions from second-order perturbation theory analysis of  $\text{CCl}_2\text{HCOF}$ ,  $\text{CHF}_2\text{COF}$ ,  $\text{CF}_3\text{COF}$ ,  $[\text{CCl}_2\text{HC(OH)F}]^+\text{-HF}$ ,  $[\text{CHF}_2\text{C(OH)F}]^+\text{-HF}$ , and  $[\text{CF}_3\text{C(OH)F}]^+\text{-HF}$ . Calculated at the MP2/aug-cc-pVTZ-level of theory.

|                                            | Donor NBO | Acceptor NBO          | Stabilizing energy [kJ/mol] |
|--------------------------------------------|-----------|-----------------------|-----------------------------|
| $\text{CCl}_2\text{HCOF}$                  | LP(F1)    | $\pi^*(\text{C1-O1})$ | 167.7                       |
| $\text{CHF}_2\text{COF}$                   | LP(F1)    | $\pi^*(\text{C1-O1})$ | 173.0                       |
| $\text{CF}_3\text{COF}$                    | LP(F1)    | $\pi^*(\text{C1-O1})$ | 172.0                       |
| $[\text{CCl}_2\text{HC(OH)F}]^+\text{-HF}$ | LP(F2)    | $\pi^*(\text{C4-O2})$ | 270.4                       |
| $[\text{CHF}_2\text{C(OH)F}]^+\text{-HF}$  | LP(F1)    | $\pi^*(\text{C1-O1})$ | 283.7                       |
| $[\text{CF}_3\text{C(OH)F}]^+\text{-HF}$   | LP(F1)    | $\pi^*(\text{C1-O1})$ | 296.4                       |

**Table S15.** Calculated MEP values at the  $\pi$ -holes of  $\text{CCl}_2\text{HCOF}$ ,  $\text{CHF}_2\text{COF}$ ,  $\text{CF}_3\text{COF}$ ,  $[\text{CCl}_2\text{HC(OH)F}]^+\text{-HF}$ ,  $[\text{CHF}_2\text{C(OH)F}]^+\text{-HF}$ , and  $[\text{CF}_3\text{C(OH)F}]^+\text{-HF}$ . Calculated at the MP2/aug-cc-pVTZ-level of theory.

|                                            | $\pi$ -hole [kJ/mol] |
|--------------------------------------------|----------------------|
| $\text{CCl}_2\text{HCOF}$                  | 73.2                 |
| $\text{CHF}_2\text{COF}$                   | 113.9                |
| $\text{CF}_3\text{COF}$                    | 140.8                |
| $[\text{CCl}_2\text{HC(OH)F}]^+\text{-HF}$ | 633.1                |
| $[\text{CHF}_2\text{C(OH)F}]^+\text{-HF}$  | 679.8                |
| $[\text{CF}_3\text{C(OH)F}]^+\text{-HF}$   | 654.8                |

### Hirshfeld Surface Analysis

Hirshfeld surface analysis was performed with the CrystalExplorer software.<sup>11,12</sup> The Hirshfeld fingerprint plots of the cation of **1** are depicted in Figure S18. The different contacts and their percentages of all contacts are noted in the diagrams.

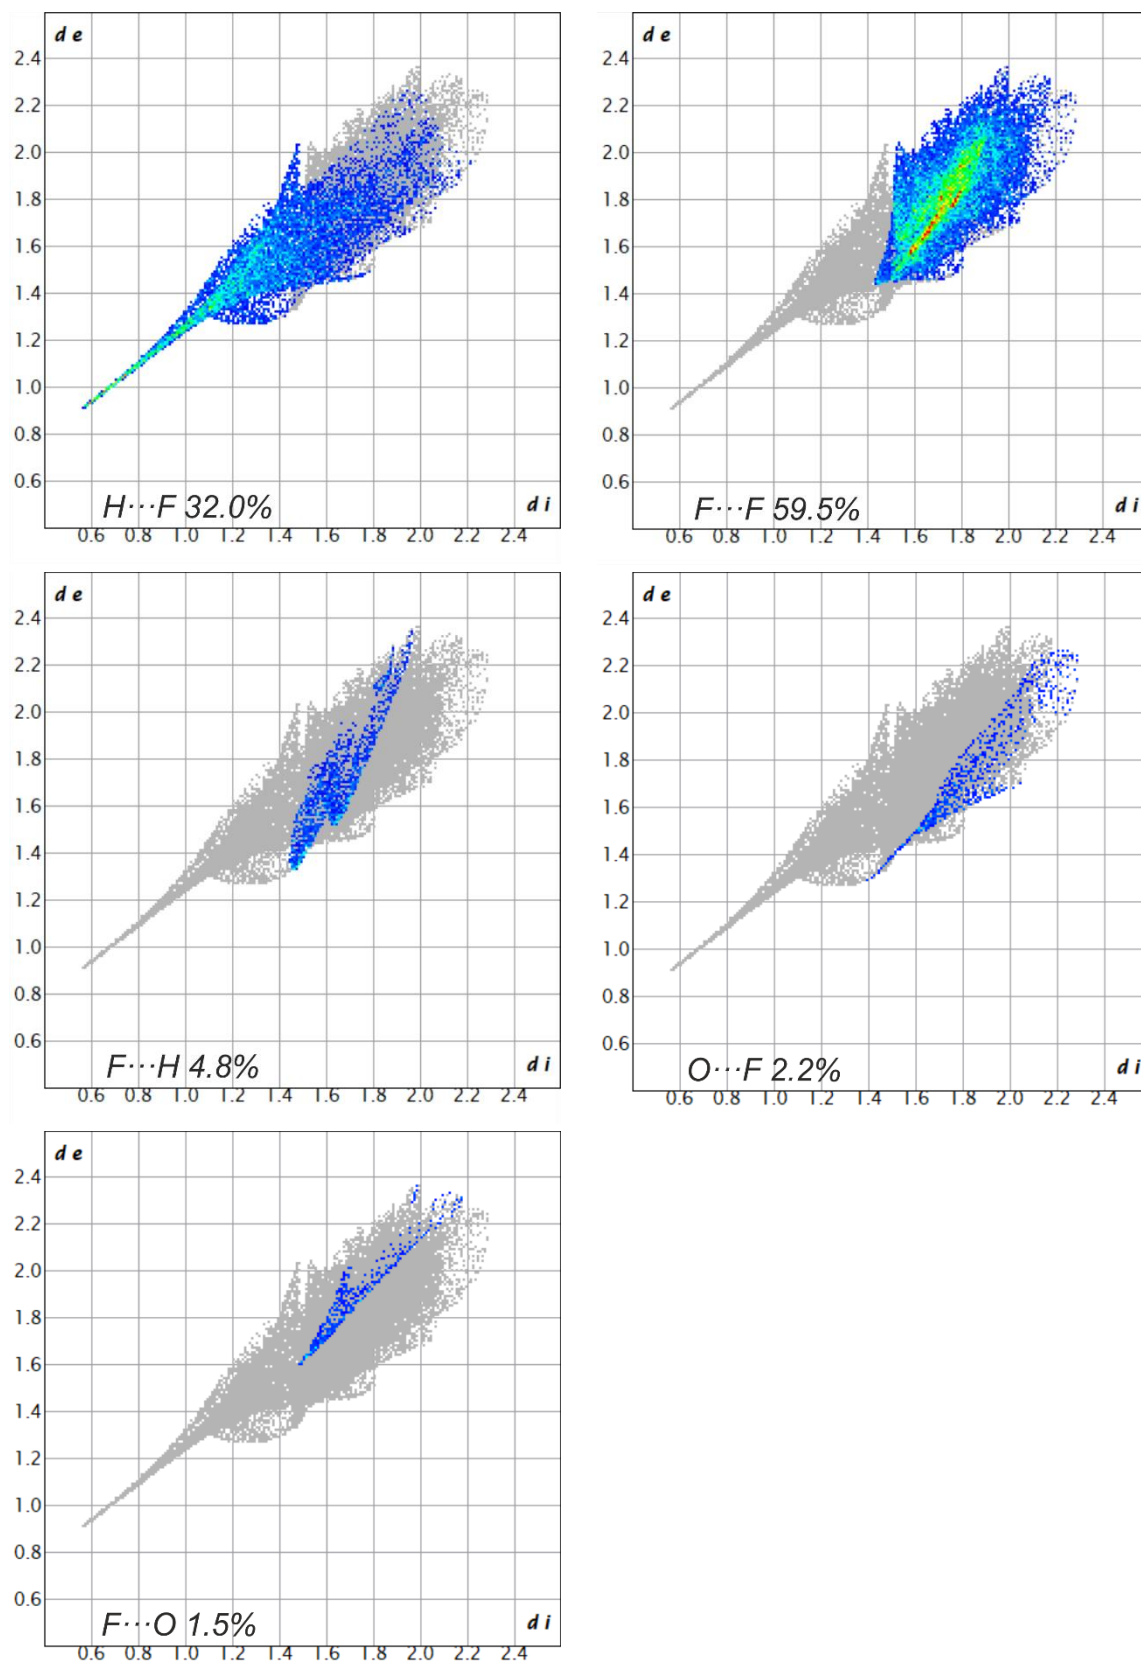

Figure S18. Fingerprint plots of the cation in the crystal structure of **1**.

## References

- [1] L. Bayersdorfer, R. Minkwitz and J. Jander, *Z. Anorg. Allg. Chem.* 1972, **393**(2), 137.
- [2] Rigaku Oxford Diffraction, CrysAlisPro Software System, *Version 1.171.40.82a*, Rigaku Corporation, Oxford, UK, 2020.
- [3] G. M. Sheldrick, *Acta Crystallogr. A Found. Adv.* 2015, **71**, 3.
- [4] G. M. Sheldrick, *Acta Crystallogr. C Struct.* 2015, **71**, 3.
- [5] L. J. Farrugia, *Journal of Applied Crystallography* 1999, **32**(4), 837.
- [6] A. Spek, *PLATON, A Multipurpose Crystallographic Tool*, Utrecht University, Utrecht (The Netherlands), 1999.
- [7] *SCALE3 ABSPACK – An Oxford Diffraction Program*, Oxford Diffraction Ltd., UK, 2005.
- [8] *MestReNova 14.0*, Mestrelab Research, 2019.
- [9] M. J. Frisch, G. W. Trucks, H. B. Schlegel, G. E. Scuseria, M. A. Robb, J. R. Cheeseman, G. Scalmani, V. Barone, B. Mennucci, G. A. Petersson, H. Nakatsuji, M. Caricato, X. Li, H. P. Hratchian, A. F. Izmaylov, J. Bloino, G. Zheng, J. L. Sonnenberg, M. Hada, M. Ehara, K. Toyota, R. Fukuda, J. Hasegawa, M. Ishida, T. Nakajima, Y. Honda, O. Kitao, H. Nakai, T. Vreven, J. A. Montgomery, J. E. Peralta, F. Ogliaro, M. Bearpark, J. J. Heyd, E. Brothers, K. N. Kudin, V. N. Staroverov, R. Kobayashi, J. Normand, K. Raghavachari, A. Rendell, J. C. Burant, S. S. Iyengar, J. Tomasi, M. Cossi, N. Rega, J. M. Millam, M. Klene, J. E. Klene, J. E. Know, J. B. Cross, V. Bakken, C. Adamo, J. Jaramillo, R. Gomperts, R. E. Stratmann, O. Yazyev, A. J. Austin, R. Cammi, C. Pomelli, J. O. Ochterski, R. L. Martin, K. Morokuma, V. G. Zakrzewski, G. A. Voth, P. Salvador, J. J. Dannenberg, S. Dapprich, A. D. Daniels, O. Farkas, J. B. Foresman, J. V. Ortiz, J. Cioslowski and D. J. Fox, *Gaussian16, Revision C.01*, Gaussian Inc., Wallingford CT, 2016.
- [10] R. Dennington, T. A. Keith and J. M. Millam, *GaussView Version 6.0*, Semi-chem Inc. Shawnee Mission, KS, 2016.
- [11] S. K. Wolff, D. J. Grimwood, J. J. McKinnon, M. J. Turner, D. Jayatilaka and M. A. Spackman, *CrystalExplorer 17.5, Revision: f4e298a*, University of Western Australia, 2017.
- [12] M. A. Spackman and D. Jayatilaka, *CrystEngComm* 2009, **11**, 19.
- [13] J. R. Durig, G. A. Guirgis and T. A. Mohamed, *J. Mol. Struct.* 1998, **444**, 165
- [14] G. D. Bent, E. Zerrad, G. W. Trucks, K. B. Wiberg and L. Taing, *J. Phys. Chem. A* 2000, **104**, 370.
- [15] G. M. Sheldrick, *Acta crystallographica. Section A, Foundations and advances* 2015, **71**, 3.
- [16] G. M. Sheldrick, *Acta crystallographica. Section C, Structural chemistry* 2015, **71**, 3.
- [17] A. F. Baxter, J. Schaab, J. Hegge, T. Saal, M. Vasiliu, D. A. Dixon, R. Haiges and K. O. Christe, *Chem. Eur. J.* 2018, **24**, 16737
- [18] S. Steiner, A. Nitzer, C. Jessen and A. J. Kornath, *Z. Anorg. Allg. Chem.* 2024, **650**, e2024000136.
